# Supplementary material for: Combined Metabolome and Transcriptome Analyses Reveal the Effects of Mycorrhizal Fungus Ceratobasidium sp. AR2 on the Flavonoid Accumulation in Anoectochilus roxburghii during Different Growth Stages
Source: MDPI journal article supplement (doi:10.3390/ijms21020564), 2020-01-15
Supplement: s1 [file s1]

## Supplementary Figure

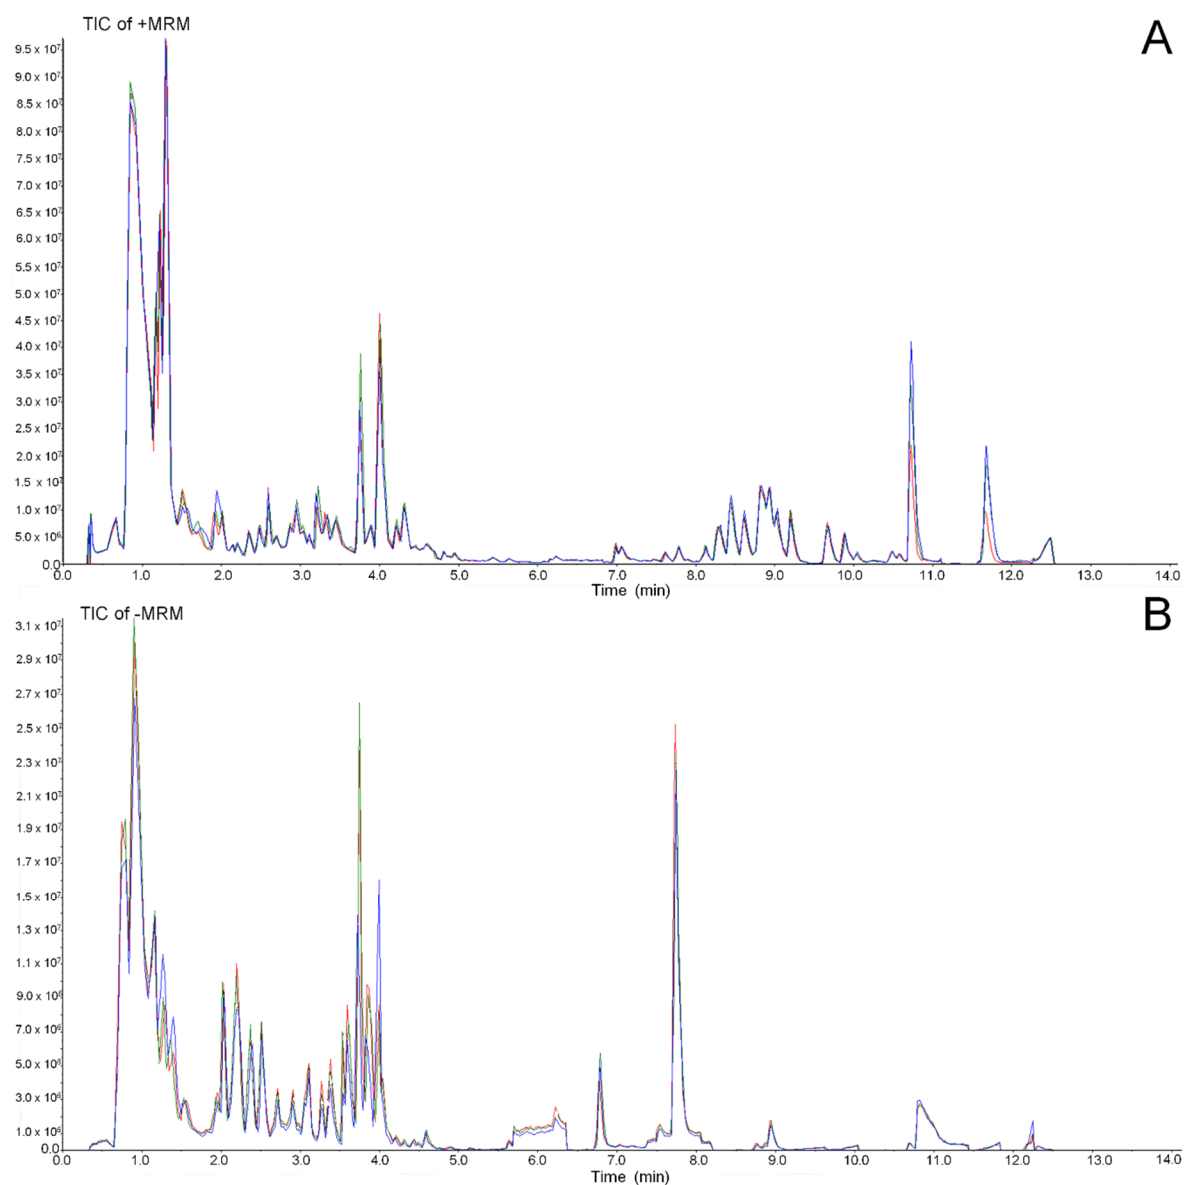

**Figure S1.** overlapping analysis of the TIC in QC samples. The x-axis represents the retention time (min) of metabolite detection, and the y-axis represents the intensity of ion current (cps: count per second). (A) for ESI<sup>+</sup> mode; (B) for ESI<sup>-</sup> mode.
