# Supplementary material for: Combined Metabolome and Transcriptome Analyses Reveal the Effects of Mycorrhizal Fungus Ceratobasidium sp. AR2 on the Flavonoid Accumulation in Anoectochilus roxburghii during Different Growth Stages
Source: Int J Mol Sci. 2020 Jan 15;21(2):564. doi: 10.3390/ijms21020564 (PMC7013922; doi:10.3390/ijms21020564)
Supplement: Supplementary file 1 [file ijms-21-00564-s001.zip]

Archive with 4 entries (4 files):
- Supplementary Figure S1.pdf
- Supplementary Table S1.xlsx
- Supplementary Table S2.xlsx
- Supplementary Table S3.xlsx
