# Supplementary material for: Combined Metabolome and Transcriptome Analyses Reveal the Effects of Mycorrhizal Fungus Ceratobasidium sp. AR2 on the Flavonoid Accumulation in Anoectochilus roxburghii during Different Growth Stages
Source: Int J Mol Sci. 2020 Jan 15;21(2):564. doi: 10.3390/ijms21020564 (PMC7013922; doi:10.3390/ijms21020564)
Supplement: Supplementary file 1 [file ijms-21-00564-s001.zip › Supplementary Table S1.xlsx]

## Sheet: Sheet1
Table S1. Total identified metabolites in the NM and M growth for six months.
Index	Q1 (Da)	Q3 (Da) MS only	Rt (min)	Molecular Weight (Da)	Ionization model	KEGG ID	Compounds	Class	mix01	mix02	mix03	AT6-1	AT6-2	AT6-3	CK6-1	CK6-2	CK6-3
MWKH2596	265.1	103.1	1.09	264.085	[M+H]+	-	Kinsenoside	-	6300000	6700000	5990000	6320000	6420000	6590000	5780000	5240000	8860000
pma0101	293.2	163.2	2.45	292.16	[M+H]+	-	N-Caffeoyl agmatine	Phenolamides	250000	295000	292000	245000	196000	266000	279000	186000	255000
pma0104	369.1	207.1	3.82	368.12	[M+H]+	-	N-sinapoyl hydroxycoumarin	Phenylpropanoids	5010000	4300000	4770000	4000000	5330000	4800000	2750000	3120000	2610000
pma0134	121	93.1	1.16	120.04	[M+H]+	-	D(-)-Threose	Carbohydrates	3650000	3780000	3770000	4460000	2390000	3340000	3130000	4710000	2740000
pma0170	498.3	177.2	3.82	497.26	[M+H]+	-	"N', N''-Diferuloylspermidine"	Phenolamides	156000	128000	84100	141000	75000	130000	139000	150000	90000
pma0214	479	317.1	3.91	478	[M+H]+	-	methylQuercetin O-hexoside	Flavonol	10100000	10100000	10700000	8130000	9890000	10400000	7700000	8900000	10800000
pma0249	479.1	317.1	3.52	478.12	[M+H]+	-	Selgin 5-O-hexoside	Flavone	13400000	15300000	15100000	11900000	13500000	15200000	11200000	10700000	12500000
pma0461	277.2	93.1	8.52	276.22	[M+H]+	-	"14,15-Dehydrocrepenynic acid"	Lipids	4620000	4970000	4610000	4280000	6470000	6640000	3830000	2310000	3360000
pma0680	484.2	220.1	3.56	483.24	[M+H]+	-	"N', N''-Feruloyl,caffeoylspermidine"	Phenolamides	180000	168000	123000	104000	66500	107000	93900	226000	114000
pma0692	438.2	147.2	3.67	437.24	[M+H]+	-	"N', N''-di-p-coumaroylspermidine"	Phenolamides	429000	331000	373000	500000	527000	707000	213000	245000	289000
pma0702	558.3	207.2	3.75	557.28	[M+H]+	-	"N', N''-disinapoylspermidine"	Phenolamides	120000	84100	51200	52900	56500	69300	71600	95000	115000
pma0724	435.1	285.1	3.79	434.1	[M+H]+	-	Naringenin C-hexoside	Flavone	42100	82100	49300	9	9	18600	12700	46000	60800
pma0757	565.3	331	4.27	564.3	[M+H]+	-	Tricin O-oxalylhexoside	Flavone	287000	214000	209000	223000	179000	204000	120000	9	202000
pma0760	565	317	4.33	564	[M+H]+	-	Selgin O-malonylhexoside	Flavone	947000	821000	890000	634000	1170000	924000	656000	696000	652000
pma0787	551.1	181.1	4.63	550.1	[M+H]+	-	Quercetin-3-(6''-malonyl)-Glucoside	Flavonol	163000	171000	157000	175000	118000	145000	97000	110000	147000
pma0791	521	273	4.5	520	[M+H]+	-	Naringenin O-malonylhexoside	Flavanone	188000	187000	117000	94500	93600	104000	123000	130000	163000
pma0825	503	255	5.24	502	[M+H]+	-	Chrysin O-malonylhexoside	Flavone	285000	237000	233000	211000	263000	259000	284000	191000	260000
pma0948	138.1	121.1	1.26	137.09	[M+H]+	-	Hydroxyphenethylamine	Others	5920000	5620000	5790000	7010000	3710000	4970000	4870000	6770000	5120000
pma1751	286	124	1.95	285	[M+H]+	-	Nicotinic acid-hexoside	Vitamins and derivatives	6640000	7170000	7360000	3910000	3270000	4100000	8570000	9040000	9820000
pma1840	250	147	2.73	250	Protonated	-	Coumaroyl choline	Alkaloids	22700000	25000000	21300000	31600000	21700000	36400000	9890000	10300000	14100000
pma2400	167.1	95	2.8	166.1	[M+H]+	-	Dihydrojasmone	Others	459000	386000	421000	372000	455000	454000	245000	346000	402000
pma2405	280	177	2.87	280	Protonated	-	Feruloylcholine	Alkaloids	3220000	3390000	3480000	2510000	5950000	4630000	2330000	1720000	1920000
pma2681	206.1	178	2.05	205.1	[M+H]+	C02470	Xanthurenic acid	Organic acids and derivatives	86900	76700	73600	67700	66500	86400	90900	59800	63600
pma2987	142.1	83.1	0.62	141.1	[M+H]+	C00860	Histidinol	Alcohols	6020000	5410000	6480000	6860000	7490000	6970000	5410000	5910000	4950000
pma3101	256.2	124.1	0.84	255.2	[M+H]+	C05841	Nicotinate ribonucleoside	Vitamins and derivatives	1820000	1840000	1930000	1890000	1960000	1630000	1780000	1770000	1440000
pma3606	295.2	179.2	9.22	294.2	[M+H]+	-	"9-Hydroxy-(10E,12Z,15Z)-octadecatrienoic acid"	Lipids	16100000	17000000	16300000	11300000	7800000	11200000	21200000	30500000	17400000
pma3649	132.1	86.1	1.01	131.1	[M+H]+	C00430	5-Aminolevulinate	Organic acids and derivatives	9850000	13800000	13100000	13600000	9310000	10300000	18000000	13000000	12800000
pma3724	369.1	177.1	3.42	368.1	[M+H]+	-	1-O-Feruloyl quinic acid	Organic acids and derivatives	40000	48400	55300	34400	72500	59300	34900	42600	28500
pma6270	258.2	104.2	0.78	258.2	Protonated	C00670	sn-Glycero-3-phosphocholine	Alkaloids	582000	437000	487000	431000	589000	553000	291000	530000	435000
pma6298	96	68.1	1.16	95.04	[M+H]+	-	3-Hydroxypyridine	Others	2860000	2860000	2810000	1070000	1150000	1210000	5050000	6140000	2100000
pma6371	611.2	473.1	3.08	610.2	[M+H]+	-	"di-C,C-hexosyl-luteolin"	Flavone	97100	125000	93900	101000	102000	122000	60900	76100	78400
pma6455	229	97	0.86	230.02	[M-H]-	C00117	Ribulose-5-phosphate	Carbohydrates	877000	773000	1050000	957000	1720000	1070000	664000	960000	672000
pma6518	771.2	177.1	4.25	770.21	[M+H]+	-	C-pentosyl-chrysoeriol 7-O-feruloylhexoside	Flavone	87100	70700	97200	125000	35400	46900	34000	53300	50400
pma6558	313.1	298.1	7.22	314.08	[M-H]-	-	Velutin	Flavone	52500	62900	50400	9	9	11700	87700	85700	117000
pma6561	341	135	2.86	342	[M-H]-	-	Caffeic acid O-glucoside	Phenylpropanoids	1540000	1970000	1910000	1750000	1620000	1430000	2970000	2180000	2450000
pma6586	567.3	405.2	4.04	566.3	[M+H]+	-	Tricin O-glycerylhexoside	Flavone	496000	448000	353000	396000	503000	199000	372000	511000	422000
pma6599	207.1	85	3.31	206.1	[M+H]+	-	6-Hydroxymethylherniarin	Phenylpropanoids	1490000	1420000	1460000	1150000	1200000	800000	1320000	1670000	1600000
pma6625	405.1	243.1	4.63	406.13	[M-H]-	-	"E-3,4,5'-Trihydroxy-3'-glucopyranosylstilbene"	Others	272000	392000	242000	389000	290000	181000	488000	415000	613000
pma6639	479.2	317.2	4.17	478.2	[M+H]+	-	Isorhamnetin O-hexoside	Flavonol	19500000	18100000	18900000	14500000	18100000	16900000	14300000	16900000	22100000
pmb0034	277.1	114.7	1.36	276.1	[M+H]+	C01425	Glu-Glu	Amino acid and derivatives	339000	191000	237000	9	9	9	499000	498000	251000
pmb0037	166.1	121.3	1.53	165.1	[M+H]+	C06199	Hordenine	Alkaloids	236000	270000	189000	249000	189000	9	212000	149000	210000
pmb0069	122	105	2.26	121	[M+H]+	C09815	Benzamide	Others	917000	867000	992000	1230000	701000	824000	705000	805000	987000
pmb0128	213.3	81	4.52	212.3	[M+H]+	-	delta-Tridecalactone	Lipids	105000	90700	119000	53700	47600	9	131000	105000	182000
pmb0130	203	144	4.72	202	[M+H]+	-	N-Acetyl tryptamine	Phenolamides	93500	85800	95200	99600	90600	97900	90900	87600	90600
pmb0142	165.1	95.2	6.04	164.1	[M+H]+	C10945	Caffeic aldehyde	Phenylpropanoids	230000	184000	223000	239000	289000	230000	130000	150000	192000
pmb0159	696.4	355.2	7.6	695.4	[M+H]+	-	DGMG (18:2) isomer2	Lipids	401000	370000	389000	301000	1080000	850000	86500	40100	80500
pmb0160	353.3	261.1	7.6	352.3	[M+H]+	-	MAG (18:3) isomer5	Lipids	2530000	2850000	2910000	2380000	6760000	6950000	606000	296000	694000
pmb0161	696.4	355.3	8.12	695.4	[M+H]+	-	DGMG (18:2) isomer1	Lipids	5530000	5970000	5570000	6540000	12700000	14900000	2080000	1270000	2780000
pmb0163	696.4	355.4	8.11	695.4	[M+H]+	-	DGMG (18:2) isomer3	Lipids	4970000	5220000	5670000	5880000	12500000	13600000	1970000	1230000	2400000
pmb0164	355.1	147.2	8.46	354.1	[M+H]+	-	MAG (18:2) isomer1	Lipids	182000	182000	222000	181000	94500	163000	328000	172000	362000
pmb0197	298.1	166.3	1.16	297.1	[M+H]+	-	N2-methylguanosine	Nucleotide and derivates	3080000	3360000	3940000	2160000	2500000	2580000	4760000	3520000	4520000
pmb0202	153	110	1.18	152	[M+H]+	C00385	Xanthine	Nucleotide and derivates	194000	201000	224000	579000	183000	178000	132000	9	149000
pmb0247	137.3	94.2	3.14	136.3	[M+H]+	C00568	p-Aminobenzoate	Organic acids and derivatives	1730000	1720000	1630000	9	1120000	9	2390000	2310000	1840000
pmb0292	387.1	331.1	7.65	386.1	[M+H]+	C00187	Cholesterol	Lipids	1690000	1560000	1660000	1210000	1300000	1070000	1010000	689000	1220000
pmb0296	357.2	265.4	8.97	356.2	[M+H]+	-	MAG (18:1) isomer2	Lipids	445000	413000	453000	518000	795000	720000	290000	188000	342000
pmb0302	126.1	96	3.69	125.1	[M+H]+	C03557	2-Aminoethylphosphonate	Lipids	57700	46600	56900	34300	41400	38800	46400	41200	53700
pmb0325	321.1	177.2	2.87	320.1	[M+H]+	-	N-Feruloyl spermidine	Phenolamides	640000	649000	737000	779000	407000	629000	790000	698000	610000
pmb0358	641.1	479.1	4.39	640.1	[M+H]+	-	Selgin O-hexosyl-O-hexoside	Flavone	455000	504000	489000	452000	613000	747000	277000	560000	391000
pmb0374	136.1	118.9	1.82	135.1	[M+H]+	-	Aminopurine	Others	7400000	6360000	7500000	4920000	3390000	6100000	10700000	5400000	13100000
pmb0382	339.1	177.2	3.88	338.1	[M+H]+	-	O-Feruloyl 4-hydroxylcoumarin	Phenylpropanoids	237000	261000	210000	270000	61000	135000	185000	202000	256000
pmb0423	195.1	145.3	3.22	194.1	[M+H]+	-	Hydroxy-methoxycinnamate	Phenylpropanoids	2900000	2570000	2900000	2100000	2230000	2510000	2100000	2490000	3030000
pmb0426	219.1	174.4	3.84	218.1	[M+H]+	C08309	"5-Methoxy-N,N-dimethyltryptamine"	Alkaloids	93200	101000	87800	125000	87300	77400	64900	76400	123000
pmb0449	162.1	97.9	0.8	161.1	[M+H]+	C00956	2-Aminoadipic acid (L-Homoglutamic acid)	Amino acid and derivatives	1610000	1760000	1650000	1710000	1750000	1730000	1620000	1520000	1480000
pmb0464	458.1	116.3	0.81	457.1	[M+H]+	-	Aspartic acid di-O-glucoside	Amino acid and derivatives	685000	969000	882000	610000	534000	434000	1480000	1260000	749000
pmb0475	671.2	509	2.85	670.2	[M+H]+	-	Gallic acid O-feruloyl-O-hexosyl-O-hexoside	Phenylpropanoids	240000	456000	351000	370000	9	445000	335000	393000	261000
pmb0478	455.1	147.4	1.92	454.1	[M+H]+	-	Coumarin O-rutinoside	Phenylpropanoids	195000	90900	91800	69400	60400	75900	93500	64500	126000
pmb0484	104.1	60.1	0.76	103.1	[M+H]+	C00114	Choline	Alkaloids	2900000	3310000	3140000	3480000	2830000	3480000	3220000	2590000	2740000
pmb0489	397.1	147.3	1.73	396.1	[M+H]+	-	N-hexosyl-p-coumaroyl putrescine	Phenolamides	510000	484000	498000	392000	397000	500000	398000	625000	430000
pmb0492	584.2	325	2.42	583.2	[M+H]+	-	"N',N"",N""'-p-coumaroyl-cinnamoyl-caffeoyl spermidine"	Phenolamides	2140000	1800000	1830000	1350000	1190000	1210000	1250000	1600000	1440000
pmb0494	295	206.9	2.77	294	[M+H]+	-	N-Sinapoyl putrescine	Phenolamides	93600	95100	83500	65000	104000	96300	76800	111000	142000
pmb0501	131.1	114.1	0.75	130.1	[M+H]+	C00179	Agmatine	Phenolamides	347000	342000	416000	172000	234000	227000	375000	528000	317000
pmb0502	292.1	147.4	1.82	291.1	[M+H]+	-	N-p-Coumaroyl spermidine	Phenolamides	9460000	9940000	10100000	12200000	11000000	12400000	6290000	6670000	5020000
pmb0514	348.1	136.1	0.85	347.1	[M+H]+	C01367	Adenosine 3'-monophosphate	Nucleotide and derivates	5220000	6680000	6060000	5430000	4870000	4040000	6050000	7490000	7340000
pmb0530	664.2	136.2	1.16	663.2	[M+H]+	C00003	Nicotinic acid adenine dinucleotide	Nucleotide and derivates	398000	448000	466000	253000	253000	254000	611000	600000	489000
pmb0542	535.1	287.5	2.99	535.1	Protonated	-	Cyanidin 3-O-malonylhexoside	Anthocyanins	59100	51800	70300	61900	64900	86600	71600	87800	82200
pmb0545	477.1	315	3.32	477.1	Protonated	-	Rosinidin O-hexoside	Anthocyanins	694000	376000	528000	119000	166000	180000	778000	271000	710000
pmb0550	449.1	287.3	2.59	449.1	Protonated	C08604	Cyanidin 3-O-glucoside (Kuromanin)	Anthocyanins	321000	318000	367000	218000	255000	272000	350000	280000	505000
pmb0557	621.1	287.3	3.26	621.1	Protonated	-	Cyanidin O-malonyl-malonylhexoside	Anthocyanins	28400	23000	41800	27300	58500	47200	21600	35500	28200
pmb0565	509.1	347.2	3.41	508.1	[M+H]+	-	Syringetin 3-O-hexoside	Flavonol	294000	258000	270000	315000	488000	341000	253000	263000	276000
pmb0566	581.2	383.2	3.74	580.2	[M+H]+	-	Luteolin O-hexosyl-O-pentoside	Flavone	143000	135000	145000	145000	98900	124000	112000	116000	159000
pmb0569	509.2	347.1	4.17	508.2	[M+H]+	-	Syringetin 5-O-hexoside	Flavone	261000	244000	216000	266000	231000	232000	223000	247000	190000
pmb0588	611.1	449.3	3.32	610.1	[M+H]+	-	"Luteolin 3',7-di-O-glucoside"	Flavone	537000	530000	577000	9	481000	470000	510000	775000	717000
pmb0595	479.2	317.2	4.17	478.2	[M+H]+	-	Isorhamnetin 5-O-hexoside	Flavonol	11800000	10700000	10700000	9720000	11600000	11000000	9040000	8850000	12100000
pmb0601	595.1	301.4	4.12	594.1	[M+H]+	-	Chrysoeriol O-hexosyl-O-pentoside	Flavone	60600	51900	52400	34700	44600	52100	51100	42400	50500
pmb0602	509.3	347.2	4.17	508.3	[M+H]+	-	Syringetin 7-O-hexoside	Flavone	264000	246000	190000	210000	273000	211000	185000	221000	173000
pmb0603	625.1	301.6	4.17	624.1	[M+H]+	-	Chrysoeriol O-hexosyl-O-hexoside	Flavone	660000	715000	697000	658000	804000	769000	531000	542000	647000
pmb0605	433.1	271.1	4.21	432.1	[M+H]+	C04608	Apigenin 7-O-glucoside (Cosmosiin)	Flavone	142000	95400	121000	111000	150000	144000	85200	9	64100
pmb0607	463.2	301.1	4.3	462.2	[M+H]+	-	Chrysoeriol 7-O-hexoside	Flavone	156000	171000	210000	172000	175000	212000	146000	203000	205000
pmb0608	549.1	301.4	4.55	548.1	[M+H]+	-	Chrysoeriol O-malonylhexoside	Flavone	143000	177000	164000	38400	72000	9	88400	765000	201000
pmb0615	789.1	626.8	2.58	788.1	[M+H]+	-	Hesperetin C-hexosyl-O-hexosyl-O-hexoside	Flavone	17300000	18000000	17600000	10800000	16000000	17400000	16900000	18700000	16100000
pmb0618	627.1	465.1	2.78	626.1	[M+H]+	-	8-C-hexosyl-hesperetin O-hexoside	Flavone	1680000	1440000	1640000	1180000	1310000	1810000	1090000	1580000	1350000
pmb0619	775.1	612.9	2.67	774.1	[M+H]+	-	Eriodictiol 6-C-hexoside 8-C-hexoside-O-hexoside	Flavone	1930000	1900000	2330000	1660000	1830000	2460000	1830000	2030000	2110000
pmb0622	611.2	473.1	3.09	610.2	[M+H]+	-	C-hexosyl-luteolin O-hexoside	Flavone	102000	106000	93900	79200	114000	104000	83100	53200	69000
pmb0628	613.1	451.1	3.09	612.1	[M+H]+	-	Eriodictiol C-hexosyl-O-hexoside	Flavone	263000	254000	278000	74800	208000	210000	297000	359000	385000
pmb0644	449.1	299.2	3.45	448.1	[M+H]+	-	Luteolin C-hexoside	Flavone	103000	106000	124000	91600	78000	63800	114000	138000	164000
pmb0645	627.1	465.2	3.41	626.1	[M+H]+	-	6-C-hexosyl-hesperetin O-hexoside	Flavone	4030000	3540000	4050000	2490000	4380000	3750000	3420000	4030000	3680000
pmb0647	581.1	419.1	3.46	580.1	[M+H]+	-	8-C-hexosyl-luteolin O-pentoside	Flavone	120000	84900	89200	60300	108000	9	90000	115000	106000
pmb0662	787.2	463.1	3.64	786.2	[M+H]+	-	C-hexosyl-luteolin O-feruloylhexoside	Flavone	330000	417000	395000	340000	392000	427000	437000	398000	401000
pmb0665	611.2	465.1	3.78	610.2	[M+H]+	-	Luteolin 8-C-hexosyl-O-hexoside	Flavone	1820000	1390000	1590000	1050000	1290000	1440000	1460000	939000	1880000
pmb0673	403.1	367.1	4.3	402.1	[M+H]+	-	Apigenin 6-C-pentoside	Flavone	139000	136000	143000	136000	115000	113000	92900	108000	119000
pmb0678	771.2	177.1	4.26	770.2	[M+H]+	-	8-C-hexosyl-apigenin O-feruloylhexoside	Flavone	70700	90700	67000	106000	41400	9	55700	44300	33100
pmb0681	403.1	367	4.32	402.1	[M+H]+	-	Apigenin 8-C-pentoside	Flavone	134000	131000	132000	110000	102000	95900	90000	73700	107000
pmb0686	537	289	4.41	536	[M+H]+	-	Eriodictyol O-malonylhexoside	Flavanone	143000	119000	125000	103000	127000	154000	138000	163000	134000
pmb0689	463.1	331.2	4.75	462.1	[M+H]+	-	Chrysoeriol C-hexoside	Flavone	4720000	4070000	4760000	3230000	4460000	3480000	4530000	4010000	5840000
pmb0703	801.1	445.3	3.96	800.1	[M+H]+	-	6-C-hexosyl-chrysoeriol O-feruloylhexoside	Flavone	291000	356000	367000	114000	72700	178000	360000	443000	322000
pmb0706	713.1	465.1	2.96	712.1	[M+H]+	-	Quercetin 5-O-malonylhexosyl-hexoside	Flavonol	1020000	992000	1230000	987000	1140000	978000	804000	962000	1140000
pmb0709	713.1	465.2	3.49	712.1	[M+H]+	-	Quercetin 7-O-malonylhexosyl-hexoside	Flavonol	1180000	952000	1170000	720000	1660000	1360000	580000	952000	833000
pmb0711	611.2	303.1	3.7	610.2	[M+H]+	-	Quercetin 7-O-rutinoside	Flavonol	4120000	3820000	3900000	3310000	3510000	3420000	3480000	2570000	5270000
pmb0712	655.2	331.1	3.5	654.2	[M+H]+	-	Tricin 5-O-hexosyl-O-hexoside	Flavone	141000	135000	148000	9	180000	139000	144000	97300	99100
pmb0716	655.2	330.9	4.16	654.2	[M+H]+	-	Tricin di-O-hexoside	Flavone	228000	236000	252000	239000	184000	152000	239000	154000	239000
pmb0724	477.1	331.1	4.99	476.1	[M+H]+	-	Tricin O-rhamnoside	Flavone	289000	259000	246000	82900	93500	104000	568000	570000	526000
pmb0736	493.1	331	4.3	492.1	[M+H]+	-	Tricin 7-O-hexoside	Flavone	892000	933000	1010000	835000	856000	800000	627000	528000	904000
pmb0738	699.2	331.1	4.88	698.2	[M+H]+	-	Tricin O-sinapoylhexoside	Flavone	66000	40200	33400	21700	11300	18400	15200	50600	26900
pmb0751	321.1	147.3	3.81	320.1	[M+H]+	-	5-O-p-Coumaroyl shikimic acid	Organic acids and derivatives	209000	152000	187000	291000	102000	142000	150000	204000	337000
pmb0764	144.1	113.2	2.6	143.1	[M+H]+	C04294	4-Methyl-5-thiazoleethanol	Alcohols	984000	1030000	984000	985000	1040000	1290000	816000	649000	1120000
pmb0766	390.4	328.3	7.2	389.4	[M+H]+	-	Azoxystrobin acid	Organic acids and derivatives	11500000	10600000	11100000	10000000	9220000	14200000	5150000	5950000	9130000
pmb0767	302.4	60.2	7.25	301.4	[M+H]+	-	D-erythro-Dihydrosphingosine	Alcohols	1480000	1720000	1670000	4250000	6970000	4520000	3470000	3710000	4270000
pmb0771	314	177	4.91	313	[M+H]+	C02717	N-Feruloyl tyramine	Phenolamides	3760000	4020000	4280000	4170000	2490000	2910000	3450000	4410000	3990000
pmb0782	86.1	69.2	1.19	85.1	[M+H]+	C01746	Piperidine	Alkaloids	5860000	6000000	6190000	6020000	4150000	4650000	8040000	5110000	8190000
pmb0786	180	162	0.69	179	[M+H]+	C00329	Glucosamine	Carbohydrates	186000	128000	160000	139000	172000	221000	94100	123000	113000
pmb0789	332.1	314.3	1.16	331.1	[M+H]+	-	Pyridoxine O-glucoside	Vitamins and derivatives	5220000	5010000	5160000	4400000	4780000	4820000	5240000	6080000	4780000
pmb0800	123.1	79.9	1.52	122.1	[M+H]+	C00153	Niacinamide	Vitamins and derivatives	11400000	10100000	10600000	8840000	10800000	8160000	6860000	13300000	11700000
pmb0801	346	184.1	1.58	345	[M+H]+	-	4-Pyridoxic acid O-hexoside	Vitamins and derivatives	1180000	1200000	915000	1020000	824000	1340000	1200000	1250000	1130000
pmb0802	220.2	202.1	2.15	219.2	[M+H]+	C00864	D-Pantothenic acid	Vitamins and derivatives	1030000	857000	1060000	942000	796000	808000	781000	835000	893000
pmb0812	127.1	81.2	2.85	126.1	[M+H]+	C02835	Imidazole-4-acetate	Indole derivatives	665000	527000	513000	555000	663000	9	626000	792000	826000
pmb0818	206.1	147.5	2.39	205.1	[M+H]+	C05660	Methoxyindoleacetic acid	Indole derivatives	3980000	3720000	4070000	4540000	2780000	4740000	3240000	1670000	4240000
pmb0819	157	130	2.39	156	[M+H]+	C02938	3-Indoleacetonitrile	Indole derivatives	1020000	927000	1210000	1270000	730000	1240000	617000	265000	942000
pmb0824	537.1	177.4	2.68	536.1	[M+H]+	-	Syringic acid O-feruloyl-O-hexoside	Organic acids and derivatives	88400	113000	135000	81400	109000	121000	121000	114000	136000
pmb0829	98.9	80.9	0.88	97.9	[M+H]+	C00009	Phosphoric acid	Organic acids and derivatives	3300000	2790000	2970000	2980000	3160000	3110000	2350000	3200000	2600000
pmb0835	611.2	287.1	2.36	610.2	[M+H]+	-	Gallocatechin-gallocatechin	Polyphenol	465000	435000	398000	158000	292000	279000	366000	566000	737000
pmb0848	494.3	184.2	7.88	493.3	[M+H]+	-	LysoPC 16:1 (2n isomer)	Lipids	2740000	2760000	2690000	2140000	9770000	4310000	259000	247000	304000
pmb0852	520.3	502.2	8.43	519.3	[M+H]+	-	LysoPC 18:2	Lipids	18000000	13600000	13700000	11600000	13400000	13500000	9210000	8820000	9170000
pmb0854	518.3	459.3	8.79	517.3	[M+H]+	-	LysoPC 18:3	Lipids	6570000	6200000	6090000	7860000	8280000	8190000	6770000	7870000	5560000
pmb0855	496.3	184.2	8.8	495.3	[M+H]+	-	LysoPC 16:0	Lipids	33800000	34300000	32800000	43000000	45600000	42800000	38800000	45900000	31400000
pmb0856	480.5	339.2	8.86	479.5	[M+H]+	-	LysoPE 18:1 (2n isomer)	Lipids	19500000	20600000	19900000	29600000	61500000	28600000	3720000	2850000	3620000
pmb0859	522.4	184	8.91	521.4	[M+H]+	-	LysoPC 18:1 (2n isomer)	Lipids	20000000	21700000	21500000	28000000	76200000	34400000	3370000	2590000	3400000
pmb0863	492.3	184	7.34	491.3	[M+H]+	-	LysoPC 16:2 (2n isomer)	Lipids	263000	286000	288000	187000	1020000	443000	25900	9	30600
pmb0864	426.3	285.2	7.69	425.3	[M+H]+	-	LysoPE 14:0	Lipids	44100	42700	35400	41700	48400	49500	30000	28900	39100
pmb0865	518.2	184.1	7.71	517.2	[M+H]+	-	LysoPC 18:3 (2n isomer)	Lipids	2740000	2890000	2750000	1970000	10500000	4500000	265000	255000	327000
pmb0866	468.1	184.4	7.74	467.1	[M+H]+	-	LysoPC 14:0	Lipids	77000	89700	86300	90400	112000	105000	70900	76700	60300
pmb0873	520	184.5	8.25	519	[M+H]+	-	LysoPC 18:2 (2n isomer)	Lipids	1260000	1340000	1450000	1290000	4650000	2560000	154000	133000	167000
pmb0874	478.6	460.6	8.38	477.6	[M+H]+	-	LysoPE 18:2 (2n isomer)	Lipids	1970000	1270000	1300000	884000	1430000	1070000	629000	502000	621000
pmb0876	454.2	313.3	8.74	453.2	[M+H]+	-	LysoPE 16:0	Lipids	7000000	7140000	7130000	16800000	14800000	12800000	11900000	11100000	11200000
pmb0877	480.1	339.9	8.87	479.1	[M+H]+	-	LysoPE 18:1	Lipids	759000	777000	771000	1180000	2480000	1170000	121000	86800	120000
pmb0882	522.1	504.2	9.07	521.1	[M+H]+	-	LysoPC 18:1	Lipids	3700000	4060000	4040000	5220000	12900000	6370000	631000	408000	607000
pmb0883	482.1	341.7	9.86	481.1	[M+H]+	-	LysoPE 18:0	Lipids	18300	17000	18500	64700	46900	26100	56500	58800	50000
pmb0885	291	190.9	6.71	290	[M+H]+	-	"4-oxo-9Z,11Z,13E,15E-octadecatetraenoic acid"	Lipids	311000	254000	277000	213000	123000	162000	193000	214000	182000
pmb0889	279.3	95.1	8.96	278.3	[M+H]+	C08364	Punicic acid	Lipids	13900000	13800000	12800000	12400000	8460000	13300000	16400000	15800000	14300000
pmb0890	355.1	263.3	10.52	354.1	[M+H]+	-	MAG (18:2)	Lipids	6100000	6320000	6580000	4550000	19200000	6750000	3220000	1870000	3110000
pmb0962	235.1	118.3	0.8	234.1	[M+H]+	-	Lysine butyrate	Amino acid and derivatives	42200	37000	33700	27300	20300	26400	22700	40900	43200
pmb0964	366.2	204.1	0.8	365.2	[M+H]+	-	iP7G	Nucleotide and derivates	1410000	1780000	1590000	1370000	1080000	1400000	1450000	2050000	1780000
pmb1096	118	91	2.39	117	[M+H]+	C00463	Indole	Indole derivatives	14000000	14100000	14500000	16600000	10800000	16300000	14000000	6480000	17600000
pmb1178	339.1	145.4	3.32	338.1	[M+H]+	-	O-Feruloyl 2-hydroxylcoumarin	Phenylpropanoids	199000	201000	149000	287000	110000	268000	115000	57100	103000
pmb1240	503.2	311.1	3.79	502.2	[M+H]+	-	Phellodensin F	Others	1460000	1610000	1450000	2250000	1760000	1100000	1660000	1390000	2180000
pmb1270	851.6	331	4.04	850.6	[M+H]+	-	Tricin 4'-O-(β-guaiacylglyceryl) ether 5-O-hexosyl-O-hexoside	Flavone	53300	82900	66600	9	37000	54900	67600	60200	46500
pmb1318	457.2	209.2	4.48	456.2	[M+H]+	-	8-Methyl-2-oxo-4-phenyl-2H-chromen-7-yl 4-(hexyloxy)benzoate	Organic acids and derivatives	3870000	3680000	4180000	4270000	2920000	4170000	3750000	3610000	4100000
pmb1452	275.1	213.2	6.23	274.1	[M+H]+	-	N-Lauryldiethanolamine	Others	1020000	992000	1060000	933000	827000	1300000	645000	632000	938000
pmb1530	317.1	137.1	7.34	316.1	[M+H]+	-	Phytocassane D	Terpene	246000	211000	216000	185000	141000	145000	160000	197000	179000
pmb1574	277.2	93	8.21	276.2	[M+H]+	-	Octadecadien-6-ynoic acid	Lipids	2970000	3530000	3670000	3140000	4530000	4540000	2300000	1300000	2050000
pmb1587	207.2	165.2	8.41	206.2	[M+H]+	-	"4-Hydroxy-3,5-diisopropylbenzaldehyde"	Organic acids and derivatives	89100	66300	114000	65600	67800	73800	9	34200	40200
pmb1605	353.3	261.4	8.45	352.3	[M+H]+	-	MAG (18:3) isomer3	Lipids	25700000	26600000	28600000	22800000	63700000	52700000	6580000	3860000	6750000
pmb1626	534.4	263.3	9.22	533.4	[M+H]+	-	MGMG (18:2) isomer1	Lipids	19200000	20700000	21200000	15200000	12600000	15700000	22100000	14500000	27800000
pmb1650	279.2	149.4	9.71	278.2	[M+H]+	-	"Octadeca-11E,13E,15Z-trienoic acid"	Lipids	5780000	6310000	5710000	7320000	8820000	7410000	6070000	4650000	5140000
pmb1652	149	121	9.71	148	[M+H]+	-	Phthalic anhydride	Others	17900000	19600000	18900000	22300000	26700000	23600000	16700000	13600000	16100000
pmb1656	353.1	335.1	9.9	352.1	[M+H]+	-	MAG (18:3) isomer4	Lipids	288000	308000	297000	165000	1120000	275000	129000	92500	112000
pmb1754	184	125	0.78	183	[M+H]+	C00588	O-Phosphocholine	Alkaloids	6390000	5220000	5940000	6330000	7660000	8270000	3530000	3880000	3950000
pmb1912	474.2	327	2.3	473.2	[M+H]+	C00234	10-Formyl-THF	Organic acids and derivatives	14400000	13900000	13800000	10700000	11600000	13100000	12500000	19700000	15400000
pmb2211	343.1	240.7	6.59	342.1	[M+H]+	-	Cocamidopropyl betaine	Alkaloids	556000	572000	570000	454000	273000	702000	539000	558000	453000
pmb2221	318.3	60.1	6.95	317.3	[M+H]+	C12144	4-Hydroxysphinganine	Lipids	8020000	8340000	8400000	11700000	10800000	10100000	10400000	20000000	14600000
pmb2222	319.1	283.7	7.07	318.1	[M+H]+	-	Phytocassane C	Terpene	1850000	2050000	1830000	2720000	2720000	2310000	2170000	4570000	3490000
pmb2251	694.1	353.7	7.6	693.1	[M+H]+	-	DGMG (18:1)	Lipids	3340000	2770000	2980000	2400000	7410000	7320000	618000	279000	646000
pmb2260	480.1	184.5	7.76	479.1	[M+H]+	-	LysoPC 15:1	Lipids	98800	89100	109000	63200	78700	83200	77900	137000	73900
pmb2319	482.3	184.1	8.26	481.3	[M+H]+	-	LysoPC 15:0	Lipids	1150000	1120000	1150000	1350000	1400000	1580000	696000	892000	869000
pmb2325	353.1	261.8	8.42	352.1	[M+H]+	-	MAG (18:3) isomer2	Lipids	1670000	1710000	1780000	1390000	4020000	3280000	372000	228000	411000
pmb2363	357.2	265.3	8.76	356.2	[M+H]+	-	MAG (18:1) isomer1	Lipids	131000	141000	152000	183000	288000	289000	50200	42200	72200
pmb2383	534.1	337.7	9.04	533.1	[M+H]+	-	MGMG (18:2) isomer2	Lipids	4590000	5300000	5350000	5310000	10500000	9230000	2340000	1700000	2290000
pmb2388	524.1	184	8.91	523.1	[M+H]+	-	LysoPC 18:0 (2n isomer)	Lipids	985000	1050000	1080000	1370000	3430000	1780000	158000	111000	174000
pmb2406	510.1	184.4	9.34	509.1	[M+H]+	-	LysoPC 17:0	Lipids	416000	478000	467000	947000	934000	943000	495000	760000	519000
pmb2444	353.2	261.3	10.06	352.2	[M+H]+	-	MAG (18:3) isomer1	Lipids	7190000	6220000	5940000	3910000	6560000	4200000	7070000	3780000	6770000
pmb2497	197	153	0.71	198	[M-H]-	C05584	4-Hydroxy-3-methoxymandelate	Organic acids and derivatives	48400	30500	51300	42700	44000	59700	37000	55300	57400
pmb2507	213.1	97	0.92	214.1	[M-H]-	C00672	2-Deoxyribose 1-phosphate	Others	346000	413000	357000	430000	470000	455000	263000	400000	287000
pmb2556	345.1	167.1	2.27	346.1	[M-H]-	-	Syringaldehyde O-glucoside	Organic acids and derivatives	137000	135000	154000	70300	104000	104000	226000	348000	137000
pmb2561	190.1	84	2.37	191.1	[M-H]-	C02712	N-Acetylmethionine	Amino acid and derivatives	99300	116000	106000	125000	126000	160000	94000	126000	99000
pmb2586	593.1	285.6	3.72	594.1	[M-H]-	-	Gallocatechin-catechin	Polyphenol	12700	21500	26700	9	9	9	22900	60600	94100
pmb2591	245	203.2	3.87	246	[M-H]-	C03137	Acetyl tryptophan	Amino acid and derivatives	1970000	3450000	2800000	1950000	1520000	2340000	2160000	7340000	2360000
pmb2620	207.1	133.1	5.52	208.1	[M-H]-	-	"3,4-Dimethoxycinnamic acid"	Phenylpropanoids	24200	29900	25500	12300	21200	25100	19800	15200	15700
pmb2640	199	181	9.66	200	[M-H]-	C02679	Lauric acid (C12:0)	Lipids	17300	24900	21900	17400	23100	20400	30200	25900	30400
pmb2648	263.1	146.9	0.74	264.1	[M-H]-	C00378	Thiamine	Vitamins and derivatives	339000	355000	385000	263000	204000	268000	525000	463000	380000
pmb2654	460.1	117.9	0.78	461.1	[M-H]-	-	Anthranilate O-hexosyl-O-hexoside	Organic acids and derivatives	1140000	1520000	1480000	923000	1720000	1130000	2210000	2360000	3760000
pmb2657	289.1	97.1	0.71	290.1	[M-H]-	C03406	Argininosuccinate	Organic acids and derivatives	57700	65800	59700	56000	58600	72700	57500	82600	62000
pmb2673	210.1	135.1	1.5	211.1	[M-H]-	-	"3-(6-Hydroxy-3,4-dioxo-1,5-cyclohexadien-1-yl)-L-alanine"	Amino acid and derivatives	63600	76000	78500	105000	67000	51500	111000	62100	91300
pmb2684	328.1	134.2	1.68	329.1	[M-H]-	C00575	Cyclic AMP	Nucleotide and derivates	3190000	3550000	3120000	2070000	1190000	1980000	4860000	3250000	6540000
pmb2723	485.1	323.2	3.44	486.1	[M-H]-	-	4-hydroxycoumarin di-glucoside	Phenylpropanoids	215000	380000	333000	150000	168000	108000	647000	610000	598000
pmb2778	295	277.3	8.96	296	[M-H]-	-	"9,10-EODE"	Lipids	2830000	3630000	3240000	2870000	2000000	2870000	5150000	4990000	4180000
pmb2786	293	275	8.42	294	[M-H]-	-	9-HOTrE	Lipids	220000	316000	285000	288000	300000	212000	470000	266000	499000
pmb2787	293.2	275.1	9.19	294.2	[M-H]-	-	9-KODE	Lipids	105000	118000	111000	70000	46700	54900	154000	247000	113000
pmb2789	309	209	7.54	310	[M-H]-	-	13-HpOTrE(r)	Lipids	687000	883000	772000	2380000	332000	450000	232000	131000	401000
pmb2791	309.1	209.1	7.55	310.1	[M-H]-	-	9-HpOTrE	Lipids	516000	581000	553000	1660000	224000	326000	156000	94400	263000
pmb2792	293	193.1	7.81	294	[M-H]-	-	13-HOTrE(r)	Lipids	977000	1200000	1080000	1120000	1390000	389000	981000	894000	1580000
pmb2795	177	145	5.5	178	[M-H]-	-	4-Methoxycinnamic acid	Phenylpropanoids	35500	40200	32000	28000	41800	75300	22300	11900	16200
pmb2799	295	195.2	9.74	296	[M-H]-	-	"12,13-EODE"	Lipids	57900	68400	59200	76100	76400	82800	70700	36600	74600
pmb2804	311.1	171.3	7.87	312.1	[M-H]-	C04717	13-HPODE	Lipids	222000	263000	258000	215000	152000	229000	360000	402000	302000
pmb2826	147	87.1	1.03	148	[M-H]-	C00815	Citramalate	Organic acids and derivatives	6360000	6760000	6720000	4920000	5520000	4540000	7200000	8660000	8090000
pmb2831	315.1	153.1	2.44	316.1	[M-H]-	-	Protocatechuic acid O-glucoside	Polyphenol	5720000	6080000	5960000	1950000	1780000	1970000	8290000	14000000	6930000
pmb2835	181.1	166	3.95	182.1	[M-H]-	-	Syringaldehyde	Phenylpropanoids	87200	104000	111000	9	9	9	209000	237000	130000
pmb2850	329	314	5.73	330	[M-H]-	-	Tricin	Flavone	61600	93200	82200	99800	73000	48800	87600	115000	150000
pmb2855	307	145	0.77	308	[M-H]-	-	L-Glutamine O-hexside	Amino acid and derivatives	26000	28000	57300	31500	13700	47400	57600	70000	35500
pmb2857	308.1	146.1	0.8	309.1	[M-H]-	-	L-Glutamic acid O-glucoside	Amino acid and derivatives	118000	180000	160000	246000	248000	226000	139000	204000	165000
pmb2867	350.1	144.1	1.72	351.1	[M-H]-	-	Kynurenic acid O-hexside	Organic acids and derivatives	76900	69200	66400	71200	94100	79400	69200	85300	63000
pmb2871	315.1	153	1.84	316.1	[M-H]-	-	"2,5-dihydroxy benzoic acid O-hexside"	Organic acids and derivatives	6570000	7530000	6590000	3080000	4990000	2950000	10500000	16500000	9160000
pmb2873	214.1	134	3.65	215.1	[M-H]-	-	3-(2-Naphthyl)-D-alanine	Amino acid and derivatives	2460000	3520000	2800000	3170000	3970000	2280000	3150000	4050000	2880000
pmb2922	565.1	323.1	1.11	566.1	[M-H]-	C00029	Uridine 5'-diphospho-D-glucose	Nucleotide and derivates	1850000	2240000	1650000	2290000	1470000	1560000	2260000	2910000	3320000
pmb2928	331	313.1	2.02	332	[M-H]-	-	Gallic acid O-Hexoside	Organic acids and derivatives	1660000	1690000	1510000	776000	343000	442000	4520000	1080000	3140000
pmb2933	311.1	149.1	2.16	312.1	[M-H]-	-	Caftaric acid	Phenylpropanoids	214000	239000	250000	177000	269000	262000	251000	265000	169000
pmb2938	353.1	100.9	3	354.1	[M-H]-	-	4-O-Caffeoyl quinic acid (criptochlorogenic acid)	Organic acids and derivatives	90800	143000	106000	108000	71900	88000	182000	184000	163000
pmb2940	385.1	205	3.26	386.1	[M-H]-	-	1-O-beta-D-Glucopyranosyl sinapate	Phenylpropanoids	1470000	2680000	2180000	1890000	1210000	2560000	2960000	3210000	4110000
pmb2954	771.1	609.3	2.83	772.1	[M-H]-	-	Luteolin O-hexosyl-O-hexosyl-O-hexoside	Flavone	1490000	1730000	1770000	1360000	1540000	1680000	2000000	1820000	2070000
pmb2957	465.1	285.1	2.59	466.1	[M-H]-	-	Cyanidin O-syringic acid	Anthocyanins	46500	47300	35600	44300	59000	37700	38200	54900	38800
pmb2968	623.1	239.1	2.48	624.1	[M-H]-	-	Chrysoeriol C-hexosyl-O-hexoside	Flavone	21200	23300	22300	9	9	9	32300	29400	46800
pmb2979	549.2	387.1	3.91	550.2	[M-H]-	-	Hesperetin O-malonylhexoside	Flavanone	146000	221000	268000	356000	184000	234000	282000	159000	149000
pmb2987	487.1	163	2.63	488.1	[M-H]-	-	Acacetin O-acetyl hexoside	Flavone	134000	199000	198000	217000	200000	209000	213000	284000	149000
pmb2999	461.1	299.1	3.87	462.1	[M-H]-	-	Chrysoeriol 5-O-hexoside	Flavone	1530000	1850000	1610000	924000	1800000	1520000	1890000	2480000	1880000
pmb3000	503.1	341.1	3.94	504.1	[M-H]-	-	Chrysoeriol O-acetylhexoside	Flavone	45700	76500	64000	91200	39600	43200	100000	123000	110000
pmb3002	607.1	299	3.98	608.1	[M-H]-	-	Chrysoeriol 7-O-rutinoside	Flavone	74600	105000	88500	105000	106000	111000	125000	116000	138000
pmb3013	519.1	314.2	4.32	520.1	[M-H]-	-	Isorhamnetin O-acetyl-hexoside	Flavonol	103000	118000	120000	78800	147000	127000	143000	153000	134000
pmb3023	449.1	287	3.37	450.1	[M-H]-	-	Eriodictyol C-hexoside	Flavone	90400	141000	146000	65900	177000	128000	115000	125000	133000
pmb3026	505.1	301.2	3.8	506.1	[M-H]-	-	Quercetin O-acetylhexoside	Flavonol	74500	89200	101000	63900	108000	109000	105000	92100	98700
pmb3028	535	491.3	3.75	536	[M-H]-	-	Tricin O-sinapic acid	Flavone	75300	170000	128000	130000	158000	118000	207000	123000	183000
pmb3041	521.1	329.2	3.81	522.1	[M-H]-	-	Tricin O-saccharic acid	Flavone	759000	1160000	978000	1510000	901000	862000	1340000	920000	1420000
pmb3043	637.1	329.2	4.07	638.1	[M-H]-	-	Tricin 5-O-rutinoside	Flavone	69200	84700	57200	60000	90200	53800	108000	85500	56500
pmb3049	657.1	329.2	4.72	658.1	[M-H]-	-	Tricin 4'-O-(syringyl alcohol) ether 7-O-hexoside	Flavone	241000	288000	307000	354000	189000	144000	362000	222000	538000
pmb3056	355.1	121.1	1.89	356.1	[M-H]-	-	Homovanilloyl quinic acid	Organic acids and derivatives	95400	91200	88300	71400	89100	115000	71700	201000	67900
pmb3062	385.1	151.1	2.12	386.1	[M-H]-	-	Eudesmoyl quinic acid	Organic acids and derivatives	155000	125000	105000	175000	156000	154000	110000	198000	125000
pmb3064	499.2	163.2	2.5	500.2	[M-H]-	-	3-O-p-coumaroyl quinic acid O-hexoside	Organic acids and derivatives	104000	157000	147000	198000	196000	118000	184000	140000	175000
pmb3066	481.1	319.2	2.62	482.1	[M-H]-	-	5-O-p-coumaroyl shikimic acid O-hexoside	Organic acids and derivatives	31600	39600	47300	52200	56500	63500	48500	56000	62800
pmb3068	337.1	173.1	2.85	338.1	[M-H]-	-	1-O-p-Coumaroyl quinic acid	Organic acids and derivatives	13900	16400	13600	9	9	9	17400	24700	14100
pmb3071	673.1	281.2	2.82	674.1	[M-H]-	-	O-p-Coumaroyl quinacyl quinic acid O-hexoside	Organic acids and derivatives	38200	46700	35500	44300	43000	36800	38300	29700	43400
pmb3081	289.1	97	1.08	290.1	[M-H]-	-	Glucarate O-Phosphoric acid	Others	719000	788000	771000	847000	1160000	883000	795000	1040000	790000
pmb3088	421.1	241.1	0.71	422.1	[M-H]-	C00689	Trehalose 6-phosphate	Carbohydrates	43000	59500	41300	44200	49000	41900	73200	87300	65000
pmb3094	703.4	351.1	2.35	704.4	[M-H]-	-	Esculetin O-quinacyl esculetin O-quinic acid	Phenylpropanoids	145000	132000	136000	103000	78400	97600	177000	153000	261000
pmb3099	153	125	1.56	154	[M-H]-	C06608	Diethyl phosphate	Organic acids and derivatives	713000	768000	682000	708000	909000	866000	967000	890000	948000
pmb3101	175.1	115	2.75	176.1	[M-H]-	C02504	2-Isopropylmalate	Organic acids and derivatives	1300000	1610000	1540000	791000	1140000	779000	795000	5340000	753000
pmb3107	359.1	182.1	2.26	360.1	[M-H]-	-	Syringic acid O-glucoside	Organic acids and derivatives	20500000	23900000	23700000	15700000	13000000	16100000	35600000	37700000	28300000
pmb3894	329.1	229.1	5.91	330.1	[M-H]-	-	Di-O-methylquercetin	Flavonol	283000	448000	354000	363000	273000	307000	492000	428000	525000
pmb4344	362.1	79.1	1.01	363.1	[M-H]-	C00144	Guanosine 5'-monophosphate	Nucleotide and derivates	3930000	3780000	3630000	4060000	3170000	3630000	3460000	4130000	4590000
pmb5304	277.1	241.2	10.62	278.1	[M-H]-	C06427	α-Linolenic acid	Lipids	18100	19000	20000	15400	18900	18600	25300	15000	25600
pmc0066	333.1	137.1	0.7	332.05	[M+H]+	C06196	2'-Deoxyinosine-5'-monophosphate	Nucleotide and derivates	493000	530000	812000	469000	237000	295000	726000	1550000	1300000
pmc0274	167.1	121.1	1.92	166.1	[M+H]+	C16614	6-Methylmercaptopurine	Nucleotide and derivates	6160000	6360000	6390000	7230000	5300000	6020000	6280000	5530000	6650000
pmc0281	400.2	136.1	1.94	399.2	[M+H]+	-	Adenosine O-ribose	Nucleotide and derivates	5100000	6040000	5700000	4100000	3190000	4450000	5710000	8540000	6400000
pmc0304	384.1	252	2.06	383.12	[M+H]+	-	Succinyladenosine	Nucleotide and derivates	921000	785000	959000	873000	735000	908000	713000	910000	760000
pmc0682	133.1	105.1	4.32	132.1	[M+H]+	-	4-Aminoindole	Indole derivatives	3590000	3200000	3450000	3990000	2330000	3260000	2060000	2000000	3720000
pmc0960	544.4	485.2	8.91	543.4	[M+H]+	-	LysoPC 20:4	Lipids	7250000	7180000	7330000	9320000	24100000	11000000	1060000	857000	1130000
pmc1990	299.1	223.1	6.78	300.1	[M-H]-	-	"4'-Hydroxy-5,7-dimethoxyflavanone"	Flavanone	522000	278000	424000	28400	31200	35200	30700	23700	39700
pmd0017	203	83	0.62	202	[M+H]+	C00750	Spermine	Phenolamides	27000000	25800000	27500000	26200000	28900000	29300000	25000000	24200000	24100000
pmd0130	468.3	184	7.73	467.3	[M+H]+	-	LysoPC 14:0 (2n isomer)	Lipids	126000	122000	148000	144000	215000	160000	116000	118000	111000
pmd0132	496.3	184	8.8	495.33	[M+H]+	-	LysoPC 16:0 (2n isomer)	Lipids	35600000	34800000	34700000	45100000	52200000	43600000	40200000	47500000	32000000
pmd0136	524.4	184	9.91	523.36	[M+H]+	-	LysoPC 18:0	Lipids	1520000	1640000	1600000	3830000	3880000	2860000	3400000	3950000	2760000
pmd0144	550.4	184	9.96	549.37	[M+H]+	-	LysoPC 20:1 (2n isomer)	Lipids	222000	155000	171000	173000	746000	260000	52300	57100	64900
pmd0145	550.4	184.1	10	549.37	[M+H]+	-	LysoPC 20:1	Lipids	133000	141000	137000	169000	719000	283000	9	9	9
pmd0158	424.2	227.2	7.51	425.2	[M-H]-	-	LysoPE 14:0 (2n isomer)	Lipids	7070	9000	8330	14300	7920	10800	12300	11000	11800
pmd0160	452.3	255.2	8.73	453.3	[M-H]-	-	LysoPE 16:0 (2n isomer)	Lipids	1100000	1510000	1360000	3380000	2920000	2430000	3150000	2560000	2720000
pme0004	190.1	127	0.84	189.11	[M+H]+	C02427	L-Homocitrulline	Amino acid and derivatives	3180000	3280000	2910000	3100000	2590000	1850000	3940000	3170000	3610000
pme0005	121	94	1.44	120.04	[M+H]+	C15587	Purine	Nucleotide and derivates	4230000	3880000	4000000	5010000	2700000	3470000	3450000	4810000	3780000
pme0006	116.1	70.1	0.81	115.06	[M+H]+	C00148	L-Proline	Amino acid and derivatives	16000000	16600000	17500000	14600000	12700000	13400000	22600000	18600000	14500000
pme0008	176.1	113	0.79	175.1	[M+H]+	C00327	L-Citrulline	Amino acid and derivatives	594000	432000	538000	499000	404000	357000	601000	504000	381000
pme0010	106	60	0.79	105.04	[M+H]+	C00065	L-Serine	Amino acid and derivatives	479000	505000	487000	433000	442000	582000	519000	466000	455000
pme0011	132	88	0.8	133.04	[M-H]-	C00049	L-Aspartic acid	Amino acid and derivatives	3240000	3170000	3080000	4760000	3180000	1600000	3540000	2390000	3160000
pme0013	146.1	102	0.75	147.05	[M-H]-	C00025	L-Glutamic acid	Amino acid and derivatives	12300000	13800000	14000000	11200000	13000000	12700000	16700000	15900000	16200000
pme0016	241	152	0.78	240.02	[M+H]+	C00491	L-(-)-Cystine	Amino acid and derivatives	64500	39500	57600	53900	43000	31100	66700	44600	47800
pme0019	132.1	86.2	1.27	131.09	[M+H]+	C00123	L-Leucine	Amino acid and derivatives	49700000	49500000	51800000	39700000	40400000	39600000	66200000	53000000	57500000
pme0020	164.1	103	1.92	165.08	[M-H]-	C00079	L-Phenylalanine	Amino acid and derivatives	20800000	23400000	23500000	28300000	20600000	23800000	28000000	19900000	24900000
pme0022	118	73.9	0.76	119.06	[M-H]-	C00188	L-Threonine	Amino acid and derivatives	462000	532000	565000	506000	367000	368000	630000	548000	668000
pme0024	124	80	0.83	125.02	[M-H]-	C00245	2-Aminoethanesulfonic acid	Organic acids and derivatives	68100	63800	66600	65900	53900	38500	61200	49900	79300
pme0026	147	84	0.78	146.11	[M+H]+	C00047	L-(+)-Lysine	Amino acid and derivatives	2650000	2270000	2550000	1990000	1660000	2000000	3890000	1590000	2830000
pme0028	245.1	113	1.22	244.07	[M+H]+	C00299	Uridine	Nucleotide and derivates	703000	696000	701000	547000	420000	462000	769000	792000	951000
pme0030	182.1	136.1	1.16	181.07	[M+H]+	C00082	L-(-)-Tyrosine	Amino acid and derivatives	1360000	1370000	1340000	1700000	937000	1220000	2140000	1190000	2570000
pme0033	137	119	1.16	136.04	[M+H]+	C00262	Hypoxanthine	Nucleotide and derivates	4480000	3790000	3430000	4560000	3840000	3500000	4160000	4950000	3620000
pme0037	156.1	110	0.72	155.07	[M+H]+	C00135	L-Histidine	Amino acid and derivatives	2140000	1970000	2090000	3380000	2180000	1290000	1870000	1090000	1790000
pme0038	112	95	0.82	111.04	[M+H]+	C00380	Cytosine	Nucleotide and derivates	5060000	5690000	6210000	5520000	5220000	5140000	5940000	7800000	5440000
pme0039	118.1	72.1	0.85	117.08	[M+H]+	C00183	L-Valine	Amino acid and derivatives	34400000	32100000	30400000	31700000	23700000	23800000	40300000	30900000	34600000
pme0040	136.1	119	1.16	135.05	[M+H]+	C00147	Adenine	Nucleotide and derivates	3350000	3020000	3090000	2880000	3030000	2860000	2400000	3580000	4080000
pme0041	132	86	1.26	131.09	[M+H]+	C00407	L-Isoleucine	Amino acid and derivatives	58200000	56800000	60200000	45700000	46500000	45500000	71900000	59600000	65100000
pme0043	175	116	0.73	174.11	[M+H]+	C00062	L-(+)-Arginine	Amino acid and derivatives	31100000	33300000	34500000	23600000	20500000	18600000	46000000	37500000	28600000
pme0056	145.1	101	2.57	146.06	[M-H]-	-	"2,3-dimethylsuccinic acid"	Amino acid and derivatives	2490000	2990000	2880000	3130000	3770000	3550000	2570000	2830000	2430000
pme0057	136	118.1	0.87	135.04	[M+H]+	C00155	DL-Homocysteine	Amino acid and derivatives	125000	122000	104000	78500	98900	72000	98700	116000	131000
pme0076	190.1	130	1.16	189.06	[M+H]+	C00624	N-Acetyl-L-glutamic acid	Amino acid and derivatives	353000	315000	289000	267000	341000	277000	186000	211000	161000
pme0080	557.3	497	7.12	558.32	[M-H]-	C08794	Cucurbitacin B	Terpene	189000	206000	183000	9	9	9	261000	486000	315000
pme0085	359.3	196.7	3.87	360.3	[M-H]-	C01850	Rosmarinic acid	Organic acids and derivatives	410000	518000	583000	588000	614000	516000	449000	620000	433000
pme0108	126.1	109	1.16	125.06	[M+H]+	C02376	5-Methylcytosine	Nucleotide and derivates	284000	303000	250000	296000	223000	416000	9	185000	9
pme0109	212.2	166	1.45	211.08	[M+H]+	C07194	"(-)-3-(3,4-Dihydroxyphenyl)-2-methylalanine"	Amino acid and derivatives	3280000	3340000	3600000	4860000	2900000	2480000	3970000	3250000	3660000
pme0118	110.1	66	3	111.03	[M-H]-	C05942	Pyrrole-2-carboxylic acid	Amino acid and derivatives	21400	24900	24900	9	9	9	38500	35900	25100
pme0120	118.2	101	0.84	117.08	[M+H]+	C00431	5-Aminovaleric acid	Amino acid and derivatives	94800	86600	78600	43200	36200	27000	138000	143000	82000
pme0122	189.2	126	1.14	188.12	[M+H]+	C02727	N6-Acetyl-L-lysine	Amino acid and derivatives	4940000	4970000	4530000	3920000	3470000	4080000	7180000	3790000	6060000
pme0128	159.2	88	0.75	160.08	[M-H]-	C00993	D-Alanyl-D-Alanine	Amino acid and derivatives	47900	50400	55700	62100	53500	55600	48500	45700	40600
pme0130	165.1	150	1.85	166.05	[M-H]-	C16357	3-Methylxanthine	Nucleotide and derivates	33200	41600	46100	22300	31900	14900	60200	89800	40400
pme0133	281.3	166	2.37	280.11	[M+H]+	-	Asp-phe	Amino acid and derivatives	1440000	1410000	1370000	1660000	1230000	1510000	1170000	1430000	1250000
pme0137	187.2	125	1.11	188.08	[M-H]-	-	Nα-Acetyl-L-glutamine	Amino acid and derivatives	1750000	2090000	1600000	1840000	2170000	2230000	1210000	1430000	874000
pme0152	129.1	84	1.57	128.06	[M+H]+	C00906	"5,6-Dihydro-5-methyluracil"	Nucleotide and derivates	520000	879000	839000	773000	702000	627000	582000	938000	504000
pme0161	118.1	72	0.75	119.06	[M-H]-	C00263	L-Homoserine	Amino acid and derivatives	21000	33600	34300	22100	9420	15100	23100	27900	37100
pme0164	263.1	204	3.9	264.11	[M-H]-	C05642	N-γ-Acetyl-N-2-Formyl-5-methoxykynurenamine	Amino acid and derivatives	76000	89800	77400	122000	143000	156000	9	56200	37200
pme0170	217.1	158	1.14	216.12	[M+H]+	-	Nα-Acetyl-L-arginine	Amino acid and derivatives	2020000	1680000	1600000	1710000	1470000	1220000	2600000	2060000	1940000
pme0174	132.1	57	1.29	131.06	[M+H]+	-	N-Propionylglycine	Amino acid and derivatives	570000	531000	564000	601000	381000	447000	902000	493000	895000
pme0181	170.1	124	0.72	169.09	[M+H]+	C01152	1-Methylhistidine	Amino acid and derivatives	61300000	53600000	51900000	39200000	46100000	52200000	61400000	46100000	60100000
pme0183	152.1	135	0.86	151.05	[M+H]+	-	2-Hydroxy-6-aminopurine	Nucleotide and derivates	1270000	1360000	1350000	1050000	1470000	1010000	1680000	1210000	1480000
pme0191	189.1	86	1.91	188.12	[M+H]+	C02155	N-Glycyl-L-leucine	Amino acid and derivatives	1460000	1610000	1630000	1640000	1850000	2140000	1110000	1270000	1130000
pme0193	147.1	84	0.76	146.07	[M+H]+	C00064	L-Glutamine	Amino acid and derivatives	3110000	2750000	3070000	2310000	1770000	2210000	4260000	2080000	3590000
pme0199	301	151	5.12	302.04	[M-H]-	C00389	Quercetin	Flavonol	48200	59500	58900	22200	35700	29700	42800	110000	33300
pme0202	611.2	303	3.7	610.15	[M+H]+	C05625	Quercetin 3-O-rutinoside (Rutin)	Flavonol	3550000	3290000	3340000	2550000	2930000	2880000	2910000	2410000	4440000
pme0207	103	59.1	1.29	104.05	[M-H]-	-	3-Hydroxybutyrate	Organic acids and derivatives	2450000	2170000	2170000	1990000	1800000	2530000	2990000	2780000	1750000
pme0226	131.1	114	0.78	132.05	[M-H]-	C00152	L-Asparagine	Amino acid and derivatives	538000	578000	596000	613000	170000	115000	1670000	329000	299000
pme0230	268.1	136	1.83	267.1	[M+H]+	C00212	Adenosine	Nucleotide and derivates	7560000	7930000	7230000	4020000	2760000	5100000	9810000	6160000	12600000
pme0231	247.1	130	4.07	246.1	[M+H]+	-	N-(3-Indolylacetyl)-L-alanine	Amino acid and derivatives	34600	28100	34000	16700	19600	24400	17500	60200	22200
pme0234	190	144	2.66	189.04	[M+H]+	C01717	Kynurenic acid	Organic acids and derivatives	3780000	3310000	3850000	4250000	2850000	3730000	2570000	2870000	3140000
pme0237	183.1	137	4.77	182.06	[M+H]+	-	"Ethyl 3,4-Dihydroxybenzoate (Ethyl protocatechuate)"	Organic acids and derivatives	531000	456000	580000	568000	528000	754000	663000	488000	542000
pme0238	113	95	2.14	112.02	[M+H]+	-	2–furanoic acid	Organic acids and derivatives	1220000	1270000	1230000	9	9	9	1960000	2190000	1640000
pme0240	121	77	4.57	122.04	[M-H]-	C00180	Benzoic acid	Organic acids and derivatives	1620000	1370000	1770000	656000	784000	742000	834000	645000	808000
pme0243	131	87	1.86	132.04	[M-H]-	C00489	Glutaric acid	Organic acids and derivatives	912000	961000	982000	466000	495000	435000	1720000	1330000	1140000
pme0245	145.1	101	2.58	146.06	[M-H]-	C06104	Adipic acid	Organic acids and derivatives	2830000	3430000	3230000	3510000	4340000	4020000	2940000	3230000	2760000
pme0246	122	76	0.77	121.02	[M+H]+	C00097	L-Cysteine	Amino acid and derivatives	109000	102000	103000	97800	98100	73700	128000	126000	145000
pme0247	130.1	84	0.76	131.06	[M-H]-	C01157	trans-4-Hydroxy-L-proline	Amino acid and derivatives	13500	18300	8460	13700	12900	9	45100	17700	17800
pme0250	187.1	125	4.47	188.1	[M-H]-	C08261	Azelaic acid	Organic acids and derivatives	619000	902000	796000	550000	611000	721000	1080000	1080000	835000
pme0252	172.1	130	3.51	173.11	[M-H]-	C02710	N-Acetyl-l-leucine	Amino acid and derivatives	7870000	11400000	10300000	11500000	9200000	11200000	12400000	12100000	10800000
pme0258	113	70	1.23	112.03	[M+H]+	C00106	Uracil	Nucleotide and derivates	426000	469000	425000	315000	215000	272000	556000	471000	623000
pme0264	243.1	127	1.99	242.09	[M+H]+	C00214	Thymidine	Nucleotide and derivates	251000	284000	280000	335000	284000	315000	211000	322000	229000
pme0267	131	87	2.12	132.04	[M-H]-	-	2-Methylsuccinic acid	Organic acids and derivatives	11300000	12300000	11700000	11600000	18000000	16900000	8440000	11300000	10400000
pme0270	117	71	1.33	116.01	[M+H]+	C01384	Maleic acid	Organic acids and derivatives	498000	553000	658000	557000	691000	617000	479000	672000	582000
pme0272	149	77	2.43	150.03	[M-H]-	C02137	Benzoylformic acid	Organic acids and derivatives	50000	65600	70800	64900	100000	41700	64700	64900	41600
pme0274	132.1	69	1.2	131.09	[M+H]+	C02378	6-Aminocaproic acid	Organic acids and derivatives	3050000	3180000	3180000	2950000	2130000	2440000	4340000	2750000	4180000
pme0279	189.1	171	0.79	190.1	[M-H]-	C00666	"2,6-Diaminooimelic acid"	Amino acid and derivatives	1870000	1840000	1810000	1760000	1560000	1590000	2030000	2000000	1800000
pme0281	165	121	2.96	166.03	[M-H]-	C06337	Terephthalic acid	Organic acids and derivatives	1930000	2710000	2480000	3080000	3310000	2660000	2490000	2380000	2230000
pme0283	167	121	2.95	166.03	[M+H]+	C01606	Phthalic acid	Organic acids and derivatives	164000	148000	198000	179000	182000	206000	82700	104000	92100
pme0285	146.1	87	0.84	145.09	[M+H]+	C01035	4-Guanidinobutyric acid	Organic acids and derivatives	6130000	6070000	5890000	6840000	4440000	4710000	5450000	7860000	7860000
pme0286	131.1	85	3.52	132.08	[M-H]-	-	2-Hydroxyisocaproic acid	Organic acids and derivatives	24800	25700	33900	33400	31800	32600	31200	33900	40900
pme0291	160.1	114	3.13	159.13	[M+H]+	-	Dl-2-Aminooctanoic acid	Organic acids and derivatives	67200	75700	103000	119000	98900	54900	64400	47700	83300
pme0300	149.1	103	5.45	148.05	[M+H]+	C00423	trans-Cinnamate	Phenylpropanoids	103000	111000	116000	94200	112000	94500	123000	92100	110000
pme0303	179	135	3.23	180.04	[M-H]-	C01197	Caffeate	Phenylpropanoids	298000	415000	401000	507000	637000	415000	334000	389000	305000
pme0306	195.1	117	4.07	194.06	[M+H]+	C01494	Ferulic acid	Phenylpropanoids	88200	76500	77600	54300	68700	76200	74900	105000	102000
pme0309	183	124	3.14	184.04	[M-H]-	-	Methyl gallate	Organic acids and derivatives	43900	40900	47000	72500	85900	48100	31000	89200	25200
pme0324	255.1	153	6.95	254.06	[M+H]+	C10028	Chrysin	Flavone	362000	361000	322000	96100	117000	84500	260000	465000	310000
pme0361	435.1	303	3.98	434.08	[M+H]+	-	Quercetin 3-alpha-L-arabinofuranoside (Avicularin)	Flavonol	323000	300000	320000	138000	140000	9	299000	297000	327000
pme0364	301.1	286	5.77	300.06	[M+H]+	C04293	Chrysoeriol	Flavone	35600	29500	34000	9	9	9	18200	65400	20600
pme0370	595.2	287	3.83	594.16	[M+H]+	-	Kaempferol 3-O-rutinoside (Nicotiflorin)	Flavonol	6640000	7740000	7620000	3120000	14100000	4850000	4280000	8540000	7930000
pme0377	273.1	153	5.59	272.07	[M+H]+	C00509	Naringenin	Flavanone	587000	563000	570000	9	9	9	716000	1240000	924000
pme0388	183.1	137	3.25	182.06	[M+H]+	C05582	Homovanillic acid	Phenylpropanoids	3410000	2900000	3420000	2520000	4780000	3340000	1940000	1830000	2810000
pme0409	199.1	140	3.34	198.05	[M+H]+	C10833	Syringic acid	Phenylpropanoids	182000	194000	191000	76500	70400	9	196000	281000	156000
pme0414	153	93	4.01	152.05	[M+H]+	C00755	Vanillin	Organic acids and derivatives	1090000	998000	1100000	301000	330000	330000	1170000	1580000	1140000
pme0418	165.1	119	3.71	166.06	[M-H]-	C01744	3-(4-Hydroxyphenyl)propionic acid	Phenylpropanoids	301000	488000	457000	1140000	501000	498000	296000	250000	211000
pme0422	193.1	134	4.08	194.06	[M-H]-	-	3-Hydroxy-4-methoxycinnamic acid	Phenylpropanoids	375000	554000	455000	263000	267000	379000	598000	702000	826000
pme0426	123.1	108	4.05	124.05	[M-H]-	C06730	4-Methylcatechol	Polyphenol	61000	87500	67100	94100	134000	165000	9	9	9
pme0442	303	229	2.98	303.24	Protonated	C05908	Delphinidin	Anthocyanins	1340000	1680000	1610000	1300000	1470000	1860000	1090000	1630000	1930000
pme0486	117	73	1.33	118.03	[M-H]-	C02170	Methylmalonic acid	Organic acids and derivatives	39400000	24100000	25400000	6820000	7870000	5220000	12600000	15100000	14300000
pme0491	138	94	1.47	139	[M-H]-	C01020	6-hydroxynicotinic acid	Vitamins and derivatives	875000	755000	735000	659000	681000	755000	496000	1010000	565000
pme0496	122	78	1.16	123	[M-H]-	C00253	Nicotinic acid	Vitamins and derivatives	169000	165000	145000	181000	166000	153000	101000	260000	66700
pme0510	197.1	153	0.63	196.06	[M+H]+	C00257	Gluconic acid	Others	36600000	35500000	39200000	40000000	36900000	39200000	37100000	37500000	37200000
pme0513	151	59	0.77	152.07	[M-H]-	C00379	Xylitol	Alcohols	368000	409000	390000	300000	152000	189000	269000	1140000	412000
pme0516	179.2	87	0.74	180.06	[M-H]-	C00137	Inositol	Alcohols	949000	1190000	1150000	1130000	1170000	1060000	1100000	1280000	1160000
pme0519	341	119	0.8	342.12	[M-H]-	-	D-(+)-Sucrose	Carbohydrates	2280000	2210000	2100000	1660000	1950000	2130000	2470000	2720000	3410000
pme1002	138.1	103	1.26	137.08	[M+H]+	C00483	L-Tyramine	Amino acid and derivatives	11900000	11100000	11700000	14100000	7800000	10000000	9970000	13400000	9820000
pme1008	216	170	1.91	215.04	[M+H]+	-	3-Chloro-L-tyrosine	Amino acid and derivatives	1170000	1160000	1070000	9	9	9	1500000	1030000	2150000
pme1014	445.3	341.3	10.77	444.3	[M+H]+	C00828	Menaquinone (K2)	Vitamins and derivatives	185000000	79800000	158000000	11300000	14500000	13000000	9190000	7880000	6770000
pme1018	613.2	484	1.16	612.15	[M+H]+	C00127	Glutathione oxidized	Amino acid and derivatives	1120000	988000	999000	660000	502000	483000	405000	266000	283000
pme1021	177.1	99	0.86	178.05	[M-H]-	C00198	"D-(+)-Glucono-1,5-lactone"	Carbohydrates	242000	274000	290000	332000	320000	280000	300000	186000	301000
pme1109	152	135	1.32	151.05	[M+H]+	C00242	Guanine	Nucleotide and derivates	1010000	1050000	1180000	922000	1230000	1260000	617000	1260000	1000000
pme1178	284.1	152	1.52	283.09	[M+H]+	C00387	Guanosine	Nucleotide and derivates	13900000	14100000	13900000	10300000	8570000	9270000	15700000	13300000	21800000
pme1184	268.1	152	1.67	267.1	[M+H]+	C00330	Deoxyguanosine	Nucleotide and derivates	493000	450000	510000	742000	499000	655000	336000	303000	452000
pme1194	228	112	1.16	227.09	[M+H]+	C00881	Deoxycytidine	Nucleotide and derivates	255000	283000	377000	293000	235000	374000	217000	283000	207000
pme1201	273.1	167	5.56	274.08	[M-H]-	C00774	Phloretin	Flavanone	143000	219000	159000	36300	63100	53400	79100	144000	45900
pme1210	150	61	1.15	149.05	[M+H]+	C00073	L-Methionine	Amino acid and derivatives	12500000	13100000	13100000	11300000	14500000	14600000	15900000	10500000	12100000
pme1218	124	106	1.15	123.03	[M+H]+	C10164	2-Picolinic acid	Organic acids and derivatives	5210000	6410000	5810000	4780000	6310000	4130000	7190000	4880000	5060000
pme1228	221.1	204	1.66	220.09	[M+H]+	C00643	5-Hydroxy-L-tryptophan	Amino acid and derivatives	1450000	1610000	1700000	1690000	1550000	1140000	1700000	1530000	1490000
pme1239	320.4	143	1.27	321.1	[M-H]-	C11347	S-(methyl)glutathione	Amino acid and derivatives	168000	165000	161000	171000	153000	124000	198000	176000	214000
pme1286	385	250	1.38	384.12	[M+H]+	C00021	S-(5'-Adenosy)-L-homocysteine	Amino acid and derivatives	1680000	1650000	1660000	1750000	2220000	2660000	706000	760000	797000
pme1292	167.1	123	2.12	168.04	[M-H]-	C00544	Homogentisic acid	Organic acids and derivatives	1590000	1850000	1800000	326000	433000	521000	3290000	3530000	2370000
pme1294	283	151	1.75	284.08	[M-H]-	C01762	Xanthosine	Nucleotide and derivates	1730000	1810000	1710000	1520000	1730000	1160000	2530000	2440000	2060000
pme1313	237.1	192	1.98	236.08	[M+H]+	C02700	N'-Formylkynurenine	Amino acid and derivatives	137000	99800	95200	175000	67800	62500	84500	9	9
pme1346	300.1	168	1.59	299.09	[M+H]+	-	8-Hydroxyguanosine	Nucleotide and derivates	56300000	37600000	51400000	52900000	49800000	51800000	34600000	26900000	47800000
pme1373	306	110	1.17	307.06	[M-H]-	C00239	2'-Deoxycytidine-5'-monophosphate	Nucleotide and derivates	17300	32800	44400	106000	101000	62000	99500	32800	45900
pme1378	282.1	149.6	2.27	281.11	[M+H]+	C02494	1-Methyladenosine	Nucleotide and derivates	52000	40700	70500	40500	38200	59700	77000	34600	53500
pme1383	170.1	134.1	1.16	169.07	[M+H]+	C00314	Pyridoxine	Vitamins and derivatives	12400000	11500000	12400000	43600000	8120000	10700000	3010000	4000000	3000000
pme1397	271	149	3.85	271.24	Protonated	C05904	Pelargonidin	Anthocyanins	96600	48200	82000	68300	52800	23100	53900	28500	68600
pme1398	465.1	303	2.26	465.1	Protonated	C12138	Delphinidin 3-O-glucoside (Mirtillin)	Anthocyanins	840000	1300000	950000	862000	1130000	1060000	840000	978000	890000
pme1399	355.2	178.5	8.4	354.15	[M+H]+	C16417	Xanthohumol	Flavanone	21000	13400	13600	14000	43600	40300	6850	9	9
pme1422	149.1	105	5.41	150.07	[M-H]-	C05629	Hydrocinnamic acid	Phenylpropanoids	222000	272000	261000	263000	225000	254000	307000	256000	277000
pme1434	371.1	209	2.58	372.14	[M-H]-	C01533	Syringin	Phenylpropanoids	1980000	2570000	2270000	2870000	3430000	3360000	1890000	3100000	1830000
pme1439	165	119	3.88	164.05	[M+H]+	C00811	p-Coumaric acid	Phenylpropanoids	78400	71400	65200	110000	69500	104000	51900	52900	56500
pme1458	229.1	107	4.78	228.08	[M+H]+	C03582	Resveratrol	Phenylpropanoids	233000	318000	272000	405000	265000	591000	474000	301000	391000
pme1472	169	65	3.35	168.04	[M+H]+	C06672	Vanillic acid	Phenylpropanoids	272000	232000	280000	9	9	9	271000	426000	321000
pme1474	298	136	2.9	297.09	[M+H]+	C00170	5'-Deoxy-5'-(methylthio)adenosine	Nucleotide and derivates	4930000	4660000	4770000	3250000	4650000	4430000	3500000	4000000	3870000
pme1480	319	153	4.7	318.04	[M+H]+	C10107	Myricetin	Flavonol	91600	83500	108000	119000	146000	138000	9	9	9
pme1496	267.1	252	6.33	268.07	[M-H]-	C00858	Formononetin (4'-O-methyldaidzein)	Isoflavone	36800	38000	31600	15500	9650	35100	34600	84100	32700
pme1502	315.1	300	7.23	314.08	[M+H]+	-	Kumatakenin	Flavonol	287000	283000	306000	9	9	9	389000	467000	541000
pme1518	403.1	373	7.06	402.13	[M+H]+	C10112	Nobiletin	Flavone	310000	326000	343000	237000	230000	1410000	141000	66200	48300
pme1535	305	125	2.28	306.07	[M-H]-	C12127	(+)-Gallocatechin (GC)	Polyphenol	109000	115000	130000	112000	171000	206000	86800	65500	91200
pme1541	283.1	268	7.06	284.07	[M-H]-	C01470	Acacetin	Flavone	78100	74100	83900	43700	72300	49700	60300	206000	78800
pme1550	373.1	343	7.54	372.12	[M+H]+	C10190	Tangeretin	Flavone	253000	247000	258000	190000	226000	1150000	134000	59500	51400
pme1572	287	241	5.04	286.05	[M+H]+	C10510	"Orobol (5,7,3',4'-tetrahydroxyisoflavone)"	Isoflavone	36000	48000	44800	37500	38500	42300	57900	53200	44900
pme1578	271.1	215	5.52	270.05	[M+H]+	C06563	"Genistein (4',5,7-Trihydroxyisoflavone)"	Isoflavone	74500	54800	54500	94800	39400	114000	40000	58000	52300
pme1580	287.1	135	5.05	288.06	[M-H]-	C05631	Eriodictyol	Flavanone	25200	34200	30600	9	16300	9	26100	60800	25800
pme1588	315.1	151	5.85	316.06	[M-H]-	C10084	Isorhamnetin	Flavonol	42500	50200	43100	17800	33600	36800	24800	65000	19500
pme1598	463.1	301	3.85	464.13	[M-H]-	-	Hesperetin 5-O-glucoside	Flavanone	9210000	14600000	13400000	9030000	16200000	12300000	17500000	16200000	13200000
pme1605	593.2	285	3.76	594.16	[M-H]-	-	Kaempferol 3-O-robinobioside (Biorobin)	Flavonol	7780000	8290000	8380000	3280000	14900000	5090000	8790000	11800000	12900000
pme1622	447.1	285	3.93	448.1	[M-H]-	C12249	Kaempferol 3-O-glucoside (Astragalin)	Flavonol	122000	157000	163000	21000	611000	30400	59000	125000	41500
pme1635	533.3	371	4.85	534.21	[M-H]-	C16915	Arctiin	Phenylpropanoids	121000	146000	125000	343000	78400	109000	97800	146000	66900
pme1640	371.1	267	11.9	370.11	[M+H]+	-	sesamolin	Phenylpropanoids	121000000	50000000	109000000	7370000	8590000	8260000	8220000	5290000	4350000
pme1646	357.1	151	5.41	358.14	[M-H]-	-	Pinoresinol	Phenylpropanoids	74300	113000	95900	101000	131000	61400	136000	117000	159000
pme1682	99.1	81	5.68	98.07	[M+H]+	C08497	trans-2-Hexenal	Others	368000	419000	386000	403000	478000	562000	468000	344000	537000
pme1683	477.2	258	2.15	476.17	[M+H]+	C12276	D-Pantothenic dcid	Organic acids and derivatives	3330000	3290000	3370000	5600000	3470000	3300000	2780000	1550000	3040000
pme1691	147.1	87.2	0.85	146.12	[M+H]+	C08201	Acetylcholine	Alkaloids	25000000	26600000	27300000	29600000	20500000	20800000	23500000	31700000	31600000
pme1692	347	135	1.16	348.05	[M-H]-	C00130	Inosine 5'-monophosphate	Nucleotide and derivates	45800	41400	50000	51700	36700	29400	51000	71400	68700
pme1711	117.1	59	2.03	118.06	[M-H]-	-	3-Hydroxy-3-methyl butyric acid	Organic acids and derivatives	1030000	1110000	1050000	1400000	1080000	1050000	1160000	860000	1140000
pme1715	277	259	0.79	276.13	[M+H]+	C00449	L-Saccharopine	Amino acid and derivatives	824000	775000	901000	874000	993000	658000	806000	822000	693000
pme1730	117	59	0.74	118.03	[M-H]-	-	D-Erythronolactone	Organic acids and derivatives	109000	115000	132000	161000	113000	130000	125000	123000	137000
pme1738	138.1	95	0.8	137.07	[M+H]+	C02918	3-Carbamyl-1-methylpyridinium (1-Methylnicotinamide)	Alkaloids	178000	166000	158000	86400	130000	107000	144000	151000	149000
pme1773	595	287	2.7	595	Protonated	C08620	Cyanidin 3-O-rutinoside (Keracyanin)	Anthocyanins	126000	87400	126000	108000	97200	110000	84300	110000	139000
pme1814	153	108	2.5	154.03	[M-H]-	C00628	"2,5-dihydroxybenzoic acid (Gentisic acid)"	Organic acids and derivatives	555000	732000	686000	225000	147000	133000	1250000	1390000	763000
pme1816	353	191	2.35	354.1	[M-H]-	C17147	Neochlorogenic acid (5-O-Caffeoylquinic acid)	Organic acids and derivatives	118000	154000	133000	117000	116000	120000	196000	155000	210000
pme1828	118.1	59	0.79	117.08	[M+H]+	C00719	Betaine	Alkaloids	3210000	2610000	2650000	2670000	2680000	2990000	2540000	2790000	2550000
pme1830	117	73	1.35	118.03	[M-H]-	C00042	Succinic acid	Organic acids and derivatives	39000000	23800000	24700000	6500000	7570000	5150000	12500000	14700000	14300000
pme1841	103	86	0.76	102.12	[M+H]+	C01672	"1,5-Diaminopentane"	Phenolamides	37700	57300	51100	29800	41200	37200	55400	44000	40000
pme1846	179	71	0.77	180.06	[M-H]-	C00031	D(+)-Glucose	Carbohydrates	1460000	1600000	1630000	1930000	1480000	1420000	1160000	1470000	1800000
pme1851	130.1	88	0.81	131.07	[M-H]-	C00300	Creatine	Organic acids and derivatives	12800000	14000000	15100000	12600000	11600000	12400000	15700000	13400000	12400000
pme1894	183	83	0.76	182.08	[M+H]+	C00794	D-Sorbitol	Alcohols	343000	407000	325000	382000	471000	436000	306000	271000	434000
pme1936	114.1	86	0.62	113.06	[M+H]+	C00791	Creatinine	Organic acids and derivatives	605000	561000	602000	610000	628000	647000	553000	541000	576000
pme1944	183.1	69	0.8	182.08	[M+H]+	C00392	D-Mannitol	Alcohols	349000	290000	356000	334000	377000	553000	242000	221000	304000
pme1952	377	243	3.26	376.14	[M+H]+	C00255	Riboflavin	Vitamins and derivatives	1020000	865000	957000	644000	907000	1160000	738000	648000	746000
pme1977	173.1	111	3.87	174.09	[M-H]-	C08278	Suberic acid	Organic acids and derivatives	30200	30100	36300	18800	18500	18200	51600	59700	33600
pme1987	88	71	0.78	89.05	[M-H]-	C00041	L-Alanine	Amino acid and derivatives	53400	61800	60300	90600	59900	38200	88300	41700	66700
pme2009	149	87	1.03	150.02	[M-H]-	-	L-(+)-Tartaric acid	Organic acids and derivatives	437000	319000	461000	316000	223000	321000	396000	584000	617000
pme2019	149	59	0.81	150.05	[M-H]-	-	DL-Arabinose	Carbohydrates	1940000	2120000	2110000	1850000	2010000	1920000	2060000	2790000	2000000
pme2021	105	88	1.19	106.03	[M-H]-	-	DL-Glyceric acid	Organic acids and derivatives	151000	125000	113000	118000	154000	111000	166000	161000	107000
pme2033	133	71	0.85	134.02	[M-H]-	C00497	L(-)-Malic acid	Organic acids and derivatives	4110000	4360000	4240000	4790000	5100000	5130000	4260000	3470000	3720000
pme2036	191	85	0.92	192.06	[M-H]-	C00296	Quinic acid	Organic acids and derivatives	2340000	2460000	2790000	1990000	2890000	2390000	3230000	2870000	1870000
pme2046	170	96	0.79	169.18	[M+H]+	-	3-N-Methyl-L-histidine	Amino acid and derivatives	3580000	3520000	3810000	4550000	3160000	3160000	2600000	3350000	2640000
pme2049	103	57	1.56	104.05	[M-H]-	C05984	2-Hydroxybutanoic acid	Organic acids and derivatives	1540000	1660000	840000	1510000	1490000	1100000	1040000	1200000	1760000
pme2050	191	111	0.86	192.03	[M-H]-	C00158	Citric acid	Organic acids and derivatives	46500000	52700000	59900000	39900000	60600000	45300000	69000000	60800000	38200000
pme2054	205.1	146	2.4	204.09	[M+H]+	C00078	L-Tryptophan	Amino acid and derivatives	3310000	3030000	3540000	3810000	2450000	3730000	2710000	1320000	3680000
pme2108	163	104	0.68	162.11	[M+H]+	C00318	L-Carnitine	Alkaloids	329000	363000	342000	563000	659000	755000	85700	115000	70300
pme2111	175	87	0.85	176.12	[M-H]-	C00072	L-ascorbate	Vitamins and derivatives	7760000	7320000	7240000	6090000	12500000	5660000	5840000	9960000	10100000
pme2122	112.1	95	0.84	111.08	[M+H]+	C00388	Histamine	Amino acid and derivatives	13300000	15600000	15200000	15200000	13400000	12600000	13700000	17000000	15900000
pme2129	131.1	85	3.58	132.08	[M-H]-	-	(S)-(-)-2-Hydroxyisocaproic acid	Organic acids and derivatives	199000	244000	311000	283000	349000	180000	221000	200000	312000
pme2136	123.1	69	0.81	122.06	[M+H]+	-	DL-threitol	Alcohols	24700	19300	26200	19600	34900	31500	15200	28000	22600
pme2155	181	138	2.23	180	[M+H]+	C07480	Theobromine	Alkaloids	403000	370000	384000	264000	251000	313000	360000	503000	355000
pme2165	155	111	1.15	156.02	[M-H]-	C00295	Orotic acid	Vitamins and derivatives	1360000	1960000	1630000	1560000	2020000	1780000	2000000	1450000	1190000
pme2169	115	71	1.19	116.01	[M-H]-	C00122	Fumaric acid	Organic acids and derivatives	1970000	1920000	1680000	1030000	1050000	690000	2800000	3690000	1930000
pme2237	181.1	101	0.76	182.08	[M-H]-	C01697	Dulcitol	Alcohols	547000	609000	637000	964000	1050000	845000	278000	396000	255000
pme2241	129	85	1.62	130.03	[M-H]-	C02226	Citraconic acid	Organic acids and derivatives	694000	846000	766000	227000	380000	197000	1170000	1740000	783000
pme2253	177.1	59	0.79	178.05	[M-H]-	C01040	L-Gulonic-γ-lactone	Others	231000	230000	206000	200000	236000	220000	265000	235000	294000
pme2256	151.1	71	0.77	152.07	[M-H]-	C01904	D-Arabitol	Alcohols	543000	556000	635000	394000	197000	244000	404000	1620000	612000
pme2266	245.1	227	3.37	244.09	[M+H]+	C00120	Biotin	Vitamins and derivatives	118000	63400	83800	207000	128000	9	139000	101000	9
pme2268	138	94	0.79	137.05	[M+H]+	C01004	Trigonelline	Alkaloids	41900000	41700000	41200000	41400000	39000000	30600000	50100000	49300000	41500000
pme2278	362	211	1.17	363.06	[M-H]-	-	Guanosine monophosphate	Nucleotide and derivates	33500	28700	43400	30800	24800	16700	35900	42500	64300
pme2289	287.2	119	11	286.23	[M+H]+	C00473	Vitamin A	Vitamins and derivatives	57000	66900	52400	77000	59400	44100	56000	68100	74900
pme2292	89	72	0.64	88.1	[M+H]+	C00134	Putrescine	Phenolamides	158000	146000	268000	155000	155000	146000	204000	215000	170000
pme2321	303.1	153	5.75	302.08	[M+H]+	C01709	Hesperetin	Flavanone	199000	205000	222000	84700	94200	9	238000	355000	243000
pme2362	151	107	2.89	152.05	[M-H]-	C01984	Mandelic acid	Organic acids and derivatives	405000	547000	472000	726000	720000	656000	251000	684000	218000
pme2366	122.1	105	2.26	121.09	[M+H]+	C05332	Phenethylamine	Others	4630000	4820000	4730000	6190000	3430000	4330000	3380000	4260000	4990000
pme2367	109	81	3.22	108.02	[M+H]+	C00472	Quinone	Quinones	800000	982000	717000	929000	1050000	1030000	790000	1260000	778000
pme2380	145	101	1.14	146.02	[M-H]-	-	A-Ketoglutaric acid	Organic acids and derivatives	90700	232000	157000	317000	335000	351000	292000	421000	189000
pme2427	222.1	180	2.61	223.09	[M-H]-	-	N-Acetyl-L-tyrosine	Amino acid and derivatives	199000	266000	212000	281000	280000	257000	246000	337000	194000
pme2435	163	59	0.76	164.07	[M-H]-	C01019	L-Fucose	Carbohydrates	102000	122000	92600	131000	144000	129000	153000	96500	99100
pme2447	717.6	519	4.48	718.15	[M-H]-	-	lithospermic acid B	Organic acids and derivatives	65300	62500	54300	47500	33900	29600	81100	75200	101000
pme2457	447.3	285.2	3.87	448.1	[M-H]-	-	Luteolin 7-O-glucoside (Cynaroside)	Flavone	96300	100000	115000	12800	449000	32900	9	104000	37800
pme2478	137.1	108.4	3.06	138.03	[M-H]-	C16700	Protocatechuic aldehyde	Polyphenol	258000	307000	289000	49600	45600	63800	607000	662000	349000
pme2486	155	109	2.31	154.03	[M+H]+	C00230	Protocatechuic acid	Polyphenol	721000	693000	674000	384000	456000	411000	659000	1320000	615000
pme2507	537.5	294.5	4.35	538.11	[M-H]-	C08745	Lithospermic acid	Organic acids and derivatives	24100	29400	22300	35800	22000	25600	22300	20800	33600
pme2529	163.2	101	0.75	164.07	[M-H]-	C07326	"1,5-Anhydro-D-glucitol"	Alcohols	317000	289000	346000	439000	436000	428000	554000	507000	556000
pme2541	103	57	1.56	104.05	[M-H]-	-	α-Hydroxyisobutyric acid	Organic acids and derivatives	340000	380000	168000	319000	295000	235000	204000	289000	419000
pme2555	346	134	1.16	347.06	[M-H]-	C00020	Adenosine 5'-monophosphate	Nucleotide and derivates	531000	626000	559000	450000	431000	289000	601000	737000	675000
pme2559	174	88	1.27	175.05	[M-H]-	C01042	N-Acetylaspartate	Amino acid and derivatives	1270000	1110000	1060000	1410000	1150000	1020000	990000	1280000	1240000
pme2569	219	202	1.16	218.09	[M+H]+	C03740	(5-L-Glutamyl)-L-amino acid	Amino acid and derivatives	323000	424000	396000	376000	385000	367000	301000	370000	344000
pme2589	159.1	87	1.24	160.04	[M-H]-	C00322	Oxoadipic acid	Organic acids and derivatives	162000	156000	113000	117000	156000	129000	131000	135000	102000
pme2596	184.1	148	1.67	183.05	[M+H]+	C00847	4-Pyridoxic acid	Alkaloids	1270000	1330000	1260000	1840000	1970000	1720000	806000	648000	859000
pme2598	167.1	123	2.44	168.04	[M-H]-	-	"3,4-Dihydroxybenzeneacetic acid"	Organic acids and derivatives	2310000	2550000	2460000	2450000	2950000	2010000	2120000	3820000	1870000
pme2603	152	108	2.66	153.04	[M-H]-	C00632	3-Hydroxyanthranilic acid	Organic acids and derivatives	839000	979000	1040000	1200000	1680000	1160000	778000	1460000	631000
pme2617	166	102	0.76	165.05	[M+H]+	-	Methionine sulfoxide	Amino acid and derivatives	307000	348000	374000	366000	359000	306000	340000	282000	270000
pme2634	118	72	0.85	117.08	[M+H]+	C01826	Dl-Norvaline	Amino acid and derivatives	33800000	34500000	32200000	35500000	25600000	25200000	43900000	31900000	35500000
pme2651	742.1	620.1	1.15	743.08	[M-H]-	C00006	NADP	Nucleotide and derivates	293000	315000	260000	425000	319000	273000	400000	393000	394000
pme2670	121	92	3.72	122.04	[M-H]-	C00633	4-Hydroxybenzaldehyde	Organic acids and derivatives	3680000	3910000	3660000	3720000	2460000	2880000	3940000	2740000	3350000
pme2693	131	114	0.8	130.11	[M+H]+	C02714	N-Acetylputrescine	Phenolamides	363000	313000	364000	222000	254000	219000	430000	398000	279000
pme2698	313.4	166	3.62	312.15	[M+H]+	-	Phe-Phe	Amino acid and derivatives	182000	188000	186000	195000	172000	238000	109000	142000	164000
pme2702	144.1	102	1.62	145.07	[M-H]-	C02946	4-Acetamidobutyric acid	Organic acids and derivatives	1920000	1810000	1760000	1810000	1500000	1510000	1550000	1370000	1920000
pme2706	153.2	109	2.42	154.03	[M-H]-	C00196	"2,3-Dihydroxybenzoic acid"	Organic acids and derivatives	5590000	6020000	6040000	1950000	1630000	1440000	10500000	11700000	6420000
pme2723	146.1	91	4.54	145.05	[M+H]+	C08493	Indole-3-carboxaldehyde	Indole derivatives	177000	156000	187000	197000	212000	160000	98500	191000	168000
pme2735	399.2	250	0.77	398.14	[M+H]+	C00019	S-(5'-Adenosyl)-L-methionine	Amino acid and derivatives	56800000	53700000	64600000	42300000	55900000	55300000	57500000	55900000	62900000
pme2746	784.2	437	2.79	785.16	[M-H]-	C00016	Flavin adenine dinucleotide (FAD)	Nucleotide and derivates	393000	382000	359000	296000	283000	269000	526000	406000	421000
pme2755	222	144	0.62	221.09	[M+H]+	C00140	N-Acetyl-D-glucosamine	Carbohydrates	703000	677000	589000	556000	688000	566000	681000	534000	589000
pme2758	162	144	0.73	163.13	[M-H]-	C03079	4-Hydroxy-L-glutamic acid	Amino acid and derivatives	181000	244000	211000	277000	280000	274000	159000	184000	216000
pme2761	161	73	0.95	162.02	[M-H]-	C01127	4-Hydroxy-2-oxoglutaric acid	Organic acids and derivatives	1070000	1210000	1370000	1300000	1580000	1210000	1070000	1580000	1030000
pme2776	253.1	137	1.67	252.09	[M+H]+	C05512	2'-Deoxyinosine	Nucleotide and derivates	477000	367000	334000	471000	498000	555000	483000	443000	585000
pme2786	219	160	3.32	218.11	[M+H]+	C00978	N-Acetyl-5-hydroxytryptamine	Alkaloids	141000	103000	163000	136000	110000	150000	104000	68000	129000
pme2801	167	150	1.85	166.05	[M+H]+	C16353	7-Methylxanthine	Nucleotide and derivates	39100	41600	44400	9	9	9	35400	44000	59200
pme2819	287.2	269.3	11.1	286.23	[M+H]+	-	"All-trans-13,14-dihydroretinol"	Vitamins and derivatives	106000	152000	107000	179000	145000	122000	158000	125000	154000
pme2827	239	223	6.77	240.25	[M-H]-	C00517	Palmitaldehyde	Lipids	18600000	15000000	20600000	1580000	1610000	1760000	2380000	2060000	2480000
pme2830	140	79	0.75	141.02	[M-H]-	-	O-Phosphorylethanolamine	Others	108000	122000	121000	135000	152000	171000	117000	114000	119000
pme2836	178.1	160	2.95	177.08	[M+H]+	-	5-Hydroxytryptophol	Indole derivatives	520000	511000	469000	567000	415000	553000	325000	272000	319000
pme2884	166	124	0.85	167.04	[M-H]-	-	Guanidinoethyl sulfonate	Organic acids and derivatives	579000	547000	528000	622000	530000	437000	830000	764000	761000
pme2890	269	136	0.85	268.06	[M+H]+	C01817	L-Homocystine	Amino acid and derivatives	222000	159000	194000	140000	180000	174000	144000	275000	123000
pme2898	321.1	303	3.52	320.05	[M+H]+	C02906	Dihydromyricetin	Flavonol	557000	758000	620000	877000	203000	788000	683000	690000	859000
pme2901	353.1	191.1	2.38	354.1	[M-H]-	-	1-O-Caffeoyl quinic acid	Organic acids and derivatives	57200	79400	76700	86100	49500	68300	110000	72300	92200
pme2903	137	93	3.1	138.03	[M-H]-	C00156	4-Hydroxybenzoic acid	Organic acids and derivatives	12000000	14200000	13400000	16400000	18400000	14100000	11200000	13900000	8980000
pme2914	161	99	1.59	162.05	[M-H]-	C03761	"3-Hydroxy-3-methylpentane-1,5-dioic acid"	Amino acid and derivatives	2320000	1760000	1660000	615000	390000	271000	3000000	3090000	3000000
pme2960	273.1	153	5.57	272.07	[M+H]+	C06561	Naringenin chalcone	Flavanone	537000	580000	590000	9	125000	9	730000	1170000	861000
pme2963	287.1	259	4.62	288.06	[M-H]-	C00974	Aromadedrin (Dihydrokaempferol)	Flavonol	41600	44000	41200	15800	9	9	59900	124000	90400
pme2982	257.1	153	7.05	256.07	[M+H]+	C09827	Pinocembrin (Dihydrochrysin)	Flavanone	493000	567000	540000	9	9	9	309000	1610000	785000
pme2988	149.2	107.1	5.63	148.05	[M+H]+	C02274	"3,4-Dihydrocoumarin"	Phenylpropanoids	183000	235000	212000	635000	139000	317000	9	9	9
pme2993	193.1	133	4.16	192.04	[M+H]+	C01752	Scopoletin (7-Hydroxy-5-methoxycoumarin)	Phenylpropanoids	90300	92300	77800	91600	61400	63500	75900	82700	53800
pme2997	163	121	4.46	162.03	[M+H]+	C20414	4-Hydroxycoumarin	Phenylpropanoids	54000	46900	58900	45800	20300	37200	37700	26500	30300
pme3007	403	159	0.7	404.16	[M-H]-	C00015	Uridine 5’-diphosphate	Nucleotide and derivates	50500	52900	54900	52300	52600	50100	73500	53800	59900
pme3011	104.1	68.8	0.77	103.06	[M+H]+	C00334	γ-aminobutyric acid	Organic acids and derivatives	956000	1110000	947000	939000	716000	510000	1490000	1080000	1140000
pme3017	104	58	0.76	103.06	[M+H]+	C03665	2-Aminoisobutyric acid	Amino acid and derivatives	14200000	15800000	15500000	16200000	14100000	16400000	13900000	11800000	13300000
pme3033	104	86	0.76	103.06	[M+H]+	C01026	"N,N-Dimethylglycine"	Amino acid and derivatives	2980000	3090000	3000000	3020000	2410000	2570000	3390000	2810000	3250000
pme3034	131	69	1.94	132.04	[M-H]-	-	ethylmalonate	Organic acids and derivatives	51500	52700	42900	34600	37100	31900	68200	79500	67200
pme3038	130	84	0.85	129.04	[M+H]+	C01879	5-oxoproline	Amino acid and derivatives	144000000	142000000	143000000	136000000	129000000	90400000	167000000	162000000	137000000
pme3069	556.3	371	10.27	555.28	[M+H]+	C05122	Taurocholic acid	Organic acids and derivatives	3060000	3430000	3440000	3320000	3660000	3430000	3300000	3000000	3350000
pme3081	169.1	134	0.77	168.09	[M+H]+	C00534	4-(Aminomethyl)-5-(hydroxymethyl)-2-methylpyridin-3-ol	Alcohols	615000	646000	645000	685000	665000	586000	691000	830000	482000
pme3083	164	120	3.87	165.04	[M-H]-	-	2-(Formylamino)benzoic acid	Organic acids and derivatives	86800	84000	112000	128000	73900	78800	72300	78300	123000
pme3096	118	74	1.34	119.02	[M-H]-	C00872	Aminomalonic acid	Organic acids and derivatives	1340000	822000	870000	233000	288000	185000	440000	524000	486000
pme3104	150	133	1.15	149.07	[M+H]+	C02216	1-Methyladenine	Nucleotide and derivates	394000	358000	378000	330000	400000	405000	474000	346000	332000
pme3123	209	179	3.88	210.09	[M-H]-	C02325	Sinapyl alcohol	Phenylpropanoids	91300	137000	110000	204000	202000	283000	40800	20800	29200
pme3130	465	303	3.86	464.1	[M+H]+	-	Quercetin 4'-O-glucoside (Spiraeoside)	Flavonol	3040000	3040000	2990000	1530000	3870000	2830000	2550000	2800000	2320000
pme3137	239	165	7.73	238.06	[M+H]+	C20871	3-Hydroxyflavone	Flavonol	32100	32500	29600	11900	9	18100	25400	63700	20800
pme3154	147.1	59	1.22	148.07	[M-H]-	-	(Rs)-Mevalonic acid	Organic acids and derivatives	726000	699000	656000	417000	535000	629000	674000	897000	720000
pme3160	259	97	0.71	260.03	[M-H]-	C00092	D-Glucose 6-phosphate	Carbohydrates	3080000	3160000	3130000	2440000	2740000	3230000	3600000	3640000	3450000
pme3163	289	97	1.07	290.04	[M-H]-	-	D-Sedoheptuiose 7-phosphate	Carbohydrates	722000	762000	695000	1070000	1380000	1030000	785000	1200000	917000
pme3171	322	97	0.82	323.05	[M-H]-	C00055	Cytidine 5'-monophosphate (Cytidylic acid)	Nucleotide and derivates	240000	261000	258000	271000	246000	266000	187000	178000	245000
pme3184	332	136	1.17	331.07	[M+H]+	C00360	2'-Deoxyadenosine-5'-monophosphate	Nucleotide and derivates	15000000	14900000	17200000	13700000	15800000	13400000	16200000	18100000	16500000
pme3188	323	211	1.18	324.04	[M-H]-	C00105	Uridine 5'-monophosphate	Nucleotide and derivates	155000	166000	151000	120000	93100	80000	153000	156000	196000
pme3194	118	58	1.02	117.04	[M+H]+	-	N-acetylglycine	Amino acid and derivatives	2990000	3020000	3300000	2820000	2820000	2740000	3430000	4420000	2740000
pme3198	153	109	2.75	154.03	[M-H]-	-	"2,4-Dihydroxybenzoic acid"	Organic acids and derivatives	3920000	5050000	4900000	1760000	1480000	1200000	9540000	10600000	4780000
pme3200	74	57	0.71	73.1	[M+H]+	-	1-methylguanidine	Nucleotide and derivates	773000	690000	704000	1140000	560000	1120000	452000	823000	420000
pme3207	141	59	0.69	142.03	[M-H]-	-	"trans,trans-Muconic acid"	Organic acids and derivatives	395000	438000	621000	417000	267000	483000	521000	981000	530000
pme3212	465	303	3.87	464.1	[M+H]+	C05623	Quercetin 3-O-glucoside (Isotrifoliin)	Flavonol	2820000	2980000	2940000	1610000	3560000	2860000	2550000	2760000	2740000
pme3227	579	433	3.68	578.16	[M+H]+	C12628	Vitexin 2''-O-beta-L-rhamnoside	Flavone	65600	73400	59500	55800	9	9	25800	45400	39800
pme3246	341	179	2.72	342.13	[M-H]-	C00761	Coniferin	Phenylpropanoids	3770000	4780000	4200000	4180000	3520000	3380000	7020000	4930000	5180000
pme3256	611	303	2.37	611	Protonated	C16315	Delphinidin 3-O-rutinoside (Tulipanin)	Anthocyanins	386000	429000	498000	384000	469000	492000	300000	349000	307000
pme3261	271	215	4.48	270.05	[M+H]+	C14314	6-Hydroxydaidzein	Isoflavone	303000	367000	433000	383000	250000	347000	247000	293000	432000
pme3266	271	201	4.43	270.05	[M+H]+	C02495	2'-Hydroxydaidzein	Isoflavone	627000	695000	619000	573000	480000	530000	557000	484000	680000
pme3268	449	287	3.87	448.1	[M+H]+	C12626	Kaempferol 3-O-galactoside (Trifolin)	Flavonol	4030000	3590000	3310000	1350000	5340000	1970000	2130000	4090000	3740000
pme3285	275	139	3.4	274.08	[M+H]+	C09320	"Afzelechin (3,5,7,4'-Tetrahydroxyflavan)"	Flavanone	174000	220000	189000	200000	204000	182000	156000	143000	180000
pme3290	331	316	6.63	330.07	[M+H]+	C01265	"3,7-Di-O-methylquercetin"	Flavonol	256000	293000	289000	62100	25600	105000	275000	153000	734000
pme3300	301	151	4.51	302.04	[M-H]-	C10192	Tricetin	Flavone	75000	87800	83400	27500	76100	91600	135000	81100	66600
pme3309	145.1	101	2.58	146.06	[M-H]-	-	2-Methylglutaric acid	Organic acids and derivatives	2510000	3020000	2850000	3100000	3810000	3530000	2630000	2910000	2450000
pme3313	259	97	0.83	260.03	[M-H]-	C00085	D-Fructose 6-phosphate	Carbohydrates	977000	979000	960000	841000	907000	1040000	1100000	1080000	1110000
pme3337	384	252	2.06	383.11	[M+H]+	-	N6-Succinyl Adenosine	Nucleotide and derivates	626000	650000	694000	755000	568000	639000	459000	729000	570000
pme3346	131.1	85	2.76	132.08	[M-H]-	-	5-hydroxyhexanoic acid	Organic acids and derivatives	700000	830000	692000	766000	730000	904000	658000	1450000	665000
pme3351	144.1	126	0.84	145.07	[M-H]-	C04076	Allysine(6-Oxo DL-Norleucine)	Amino acid and derivatives	38000	55800	54300	66500	54000	32900	59700	40500	36600
pme3384	162	74	1.16	161.07	[M+H]+	-	N-Acetylthreonine	Amino acid and derivatives	589000	594000	640000	523000	552000	656000	641000	434000	730000
pme3388	189	144	0.75	188.13	[M+H]+	C01924	H-HomoArg-OH	Amino acid and derivatives	2600000	2870000	3240000	2260000	2190000	2430000	3220000	2450000	2440000
pme3392	433.1	271	2.83	433.1	Protonated	-	Pelargonidin 3-O-beta-D-glucoside（Callistephin chloride)	Anthocyanins	622000	455000	450000	378000	288000	440000	533000	399000	353000
pme3396	289	215	3.65	288.06	[M+H]+	C01378	Fustin	Flavonol	116000	121000	118000	59800	69000	57500	99100	63200	95100
pme3404	347	153	5.8	346.07	[M+H]+	C11620	Syringetin	Flavonol	21800	18100	16900	20200	14100	18000	16100	13300	15000
pme3419	179	123	3.24	178.03	[M+H]+	C09263	"Esculetin (6,7-dihydroxycoumarin)"	Phenylpropanoids	1870000	1470000	1770000	263000	226000	243000	1880000	2340000	1910000
pme3428	339.1	177	2.72	340.08	[M-H]-	C09264	"Esculin (6,7-Dihydroxycoumarin-6-glucoside)"	Phenylpropanoids	248000	293000	281000	262000	263000	232000	241000	397000	257000
pme3440	273.1	136.9	5.49	272.07	[M+H]+	C08578	Butein	Flavanone	116000	125000	139000	155000	142000	168000	117000	105000	90600
pme3446	209.1	177	4.62	208.07	[M+H]+	-	Sinapinaldehyde	Phenylpropanoids	161000	151000	154000	9	9	9	200000	392000	178000
pme3451	395.1	213	8.09	394.14	[M+H]+	C07593	Rotenone	Isoflavone	94100	99100	97800	9	9	9	78900	224000	120000
pme3461	301.1	151	5.75	302.28	[M-H]-	C09756	Homoeriodictyol	Flavanone	136000	143000	144000	82400	92000	63100	180000	323000	204000
pme3464	285.1	164	6.98	286.08	[M-H]-	C05334	Isosakuranetin (4'-Methylnaringenin)	Flavanone	4310	5060	3500	3790	4980	7650	3380	4680	3730
pme3475	273.1	153	5.59	272.07	[M+H]+	C09614	Butin	Flavone	599000	559000	568000	9	118000	9	688000	1220000	869000
pme3478	277.1	146	2.84	278.13	[M-H]-	C00831	Pantetheine	Vitamins and derivatives	132000	220000	194000	264000	219000	238000	279000	397000	241000
pme3511	287.1	243	1.21	288.06	[M-H]-	-	Orotidine	Others	89400	165000	138000	127000	152000	101000	93900	88900	80200
pme3514	301	151	5.11	302.04	[M-H]-	C10105	Morin	Flavonol	43300	53900	52700	20100	22900	31300	45400	97100	28900
pme3576	138.1	92.1	4.07	137.05	[M+H]+	C00108	Anthranilic acid	Organic acids and derivatives	356000	232000	268000	471000	98300	99000	127000	202000	152000
pme3705	193.1	73	0.72	194.04	[M-H]-	C00191	D-glucoronic acid	Others	106000	110000	94900	9	136000	116000	118000	212000	9
pme3719	165.1	75	0.75	166.05	[M-H]-	-	D-Xylonic acid	Organic acids and derivatives	20600000	23600000	24200000	12400000	13300000	17700000	22800000	45900000	33700000
pme3732	244.1	112	0.83	243.09	[M+H]+	C00475	Cytidine	Nucleotide and derivates	703000	639000	763000	534000	558000	424000	858000	882000	916000
pme3827	198.2	152.2	1.16	197.07	[M+H]+	C00355	"3,4-Dihydroxy-DL-phenylalanine"	Amino acid and derivatives	484000	456000	571000	594000	374000	493000	629000	442000	756000
pme3838	346.2	152	1.33	345.05	[M+H]+	C00942	"Guanosine 3',5'-cyclic monophosphate"	Nucleotide and derivates	223000	206000	216000	181000	155000	154000	174000	193000	382000
pme3961	252	136	1.88	251.1	[M+H]+	C00559	Deoxyadenosine	Nucleotide and derivates	4090000	3800000	3930000	5880000	3510000	4360000	2950000	2430000	3520000
pme3967	312	180	2.18	311.12	[M+H]+	-	2-(dimethylamino)guanosine	Nucleotide and derivates	1230000	1260000	1300000	1130000	1410000	1180000	1090000	1030000	1290000
pme3971	245	125	1.21	244.07	[M+H]+	C02067	β-Pseudouridine	Nucleotide and derivates	211000	210000	215000	211000	173000	228000	164000	201000	234000
pme3983	269.1	137	1.49	268.08	[M+H]+	-	Hypoxanthine-9-β-D-arabinofuranoside	Nucleotide and derivates	310000	336000	316000	323000	359000	241000	384000	268000	308000
pmf0011	593.2	473	3.19	594.16	[M-H]-	-	"Apigenin 6,8-C-diglucoside"	Flavone	34900	45800	40500	15700	9	9	82700	93800	43100
pmf0014	355.1	193	3.01	354.31	[M+H]+	C01527	Scopolin	Phenylpropanoids	1160000	1100000	1160000	882000	565000	986000	865000	1530000	807000
pmf0016	150.1	61	0.87	149.05	[M+H]+	-	DL-Methionine	Amino acid and derivatives	16200000	22600000	23700000	15100000	18000000	20600000	23900000	19700000	16000000
pmf0018	102.1	56	0.76	101.05	[M+H]+	-	1-Aminocyclopropanecarboxylic acid	Amino acid and derivatives	361000	238000	298000	258000	271000	283000	418000	316000	274000
pmf0032	341.1	179	0.75	342.12	[M-H]-	-	Galactinol	Carbohydrates	730000	838000	756000	541000	654000	737000	896000	949000	1060000
pmf0035	259	97	0.78	260.03	[M-H]-	-	Glucose-1-phosphate	Carbohydrates	3140000	3350000	3330000	2510000	2740000	3110000	3530000	3760000	3630000
pmf0052	249.2	150	2.05	248.19	[M+H]+	-	Sophoridine	Alkaloids	56600	46200	49400	45800	81600	51300	50300	37500	39000
pmf0057	271.1	151	5.66	272.07	[M-H]-	C06561	"4,2',4',6'-Tetrahydroxychalcone "	Flavone	359000	436000	405000	56700	69800	26500	604000	1030000	719000
pmf0058	271	150.9	5.66	272.07	[M-H]-	C00509	"4',5,7-Trihydroxyflavanone"	Flavanone	291000	354000	345000	48500	56100	23700	540000	910000	612000
pmf0059	565.1	322.9	0.8	566.06	[M-H]-	C00029	UDP-α-D-glucose	Nucleotide and derivates	4550000	4930000	4700000	3910000	4360000	4080000	5880000	4770000	5290000
pmf0062	623.1	160.7	4.01	624.21	[M-H]-	C10501	Verbascoside	Phenylpropanoids	56200	78100	84700	72600	57500	54500	116000	79200	109000
pmf0063	785.4	623.2	3.31	786.26	[M-H]-	C10450	Echinacoside	Phenylpropanoids	5810000	7260000	7470000	5190000	9510000	7590000	8640000	6820000	8900000
pmf0066	665.2	160.9	4.28	666.62	[M-H]-	-	2'-Acetylacteoside	Organic acids and derivatives	64400	91700	84700	15000	18800	11800	245000	261000	203000
pmf0068	183.2	147	0.78	182.08	[M+H]+	C00392	Mannitol	Alcohols	54400	51500	50400	90200	65800	74200	53000	45900	40800
pmf0070	415.4	119.2	7.75	414.39	[M+H]+	C01753	β-Sitosterol	Sterides	10200000	9610000	9770000	4540000	4850000	5050000	7110000	4560000	7400000
pmf0073	399.4	235	12.28	400.37	[M-H]-	C01789	Campesterol	Sterides	4640	4790	4990	4980	5410	4970	5730	5190	4680
pmf0076	413.4	301.1	11.55	412.37	[M+H]+	C05442	Stigmasterol	Sterides	1190000	1090000	1030000	1550000	1240000	1080000	1660000	1460000	1450000
pmf0079	457.4	375.1	12.32	458.38	[M-H]-	C08980	Soyasapogenol B	Sterides	1670000	1800000	1690000	1760000	1650000	1690000	1990000	1900000	1750000
pmf0085	427.4	345	12.26	426.39	[M+H]+	C01902	Cycloartenol	Sterides	486000	499000	490000	482000	480000	492000	467000	494000	492000
pmf0091	427.4	345	12.26	426.39	[M+H]+	-	"2,3-Oxidosqualene"	Sterides	531000	563000	570000	543000	531000	530000	528000	548000	523000
pmf0094	179.1	147.1	5.48	178.18	[M+H]+	-	Methyl p-coumarate	Phenylpropanoids	81700	74000	107000	78100	84900	158000	9	9	9
pmf0095	207.1	133.1	5.72	208.21	[M-H]-	-	Methyl ferulate	Phenylpropanoids	52700	46800	46700	26600	40100	51200	41100	24900	26100
pmf0098	177	145	5.53	178.18	[M-H]-	-	trans-4-Hydroxycinnamic acid Methyl Ester	Phenylpropanoids	62800	73100	68400	42900	78400	127000	35600	18500	26200
pmf0111	253	224.8	6.08	254.06	[M-H]-	C10200	Anhydroglycinol	Flavonoid	130000	191000	157000	198000	34100	82600	129000	295000	216000
pmf0116	627.2	303.1	1.88	662.12	[M-Cl]+	C16312	Delphin chloride	Anthocyanins	5260000	5440000	6420000	5770000	6600000	6680000	3370000	4220000	6140000
pmf0118	565.1	322.9	0.8	610.02	[M-2Na+H]-	-	Uridine 5'-diphosphoglucose disodium salt	Nucleotide and derivates	4380000	5120000	5590000	4810000	4560000	4130000	5670000	4620000	4810000
pmf0129	229.1	211.1	8.88	228.08	[M+H]+	-	Benzyl salicylate	Organic acids and derivatives	128000	107000	103000	9	9	9	105000	338000	96100
pmf0132	141	123	1.96	140.01	[M+H]+	-	Coumalic acid	Organic acids and derivatives	3330000	3310000	3430000	2580000	3180000	2940000	2830000	3500000	3700000
pmf0138	179	59	0.87	180.063	[M-H]-	C00159	D-(+)-Mannose	Carbohydrates	2590000	2880000	3260000	3110000	2500000	2930000	2670000	2390000	3260000
pmf0139	179	59	0.67	180.06	[M-H]-	C00124	D-(+)-Galactose	Carbohydrates	2880000	3010000	3190000	4010000	3500000	3440000	2280000	2460000	3530000
pmf0141	121	76.9	4.58	122.07	[M-H]-	C05853	2-Phenylethanol	Others	1810000	1520000	2020000	720000	955000	936000	848000	761000	1050000
pmf0164	401.2	299.6	10.16	400.46	[M+H]+	-	Schizandrin B	Phenylpropanoids	17200	13000	12900	9	13800	13400	11800	33000	14200
pmf0174	157.2	157.2	7.72	158.28	[M-H]-	C01633	1-Decanol	Alcohols	44800000	50800000	47600000	23600000	20200000	28900000	29000000	21500000	36000000
pmf0175	157.2	157.2	7.84	158.28	[M-H]-	-	2-Decanol	Alcohols	46000000	53200000	50900000	24800000	21300000	30100000	29900000	21600000	37100000
pmf0179	623.2	315.1	4.04	624.17	[M-H]-	-	Narcissoside	Flavonoid	7610000	8920000	9290000	8970000	8960000	8080000	11100000	8900000	11100000
pmf0196	167	78.7	1.09	205.94	[M]-	-	Phosphoenolpyruvic acid	Organic acids and derivatives	910000	892000	805000	739000	649000	590000	1030000	1350000	1180000
pmf0203	463.1	301.1	2.94	498.09	[M-Cl]+	-	Peonidin 3-O-glucoside chloride	Anthocyanins	534000	280000	485000	433000	448000	458000	384000	410000	400000
pmf0204	465.1	303	3.73	464.1	[M+H]+	-	Hyperoside	Flavonoid	4000000	4180000	4560000	3230000	3330000	4320000	4650000	3260000	5390000
pmf0208	465.1	303	3.9	464.1	[M+H]+	-	Isoquercitroside	Flavonoid	3580000	3520000	3520000	1970000	4510000	3480000	3060000	3650000	3230000
pmf0209	306.2	137	7.49	305.2	[M+H]+	C06866	Capsaicin	Alkaloids	28100	23500	18800	28300	34400	27300	15700	18200	20600
pmf0217	259	78.9	0.79	304.1	[M-2Na+H]-	-	D-Glucose-6-phosphate disodium salt	Others	2570000	2570000	2510000	1950000	2090000	2850000	2800000	2740000	2690000
pmf0218	167	78.8	0.84	233.99	[M-3Na+2H]-	-	Phosphoenolpyruvate trisodium salt	Organic acids and derivatives	204000	219000	240000	149000	142000	127000	277000	263000	305000
pmf0220	259	97	0.8	303.99	[M-2Na+H]-	-	D-Fructose 6-phosphate-disodium salt	Carbohydrates	3100000	3480000	3560000	2480000	3010000	3310000	3830000	4130000	3750000
pmf0231	349.9	198	10.08	348.93	[M+H]+	C14322	Chlorpyrifos	Alkaloids	73300	79400	69200	101000	116000	89500	60900	48400	59700
pmf0235	565.2	409.1	3.52	564.15	[M+H]+	-	Isoschaftoside	Flavonoid	55000	104000	83600	101000	108000	129000	50900	36900	69100
pmf0243	271.1	98.9	12.27	270.11	[M+H]+	-	Benzyl β-D-Glucopyranoside	Others	3720000	4950000	4470000	4630000	4310000	4750000	4840000	4790000	4390000
pmf0245	143	69	1.5	142.03	[M+H]+	C14516	Kojic acid	Organic acids and derivatives	474000	553000	502000	642000	722000	781000	292000	319000	259000
pmf0255	1032.5	870.7	4.84	1033.55	[M-H]-	C10827	Tomatine	Alkaloids	33900	36400	29000	43600	30200	31700	46600	37700	46400
pmf0256	101.1	84.7	1.28	102.1	[M-H]-	-	3-Methyl-1-pentanol	Alcohols	903000	857000	902000	1020000	1290000	1160000	1150000	778000	1130000
pmf0274	301	211.4	5.13	302.04	[M-H]-	-	Herbacetin	Flavonoid	29800	35900	31000	22500	33900	26100	32600	53500	35000
pmf0279	465.1	229.2	3.81	464.1	[M+H]+	-	Gossypitrin	Flavonoid	784000	772000	710000	313000	835000	731000	699000	759000	618000
pmf0280	193	113.1	0.79	194.04	[M-H]-	C00333	D-Galacturonic acid	Organic acids and derivatives	7650000	9270000	10400000	7130000	9900000	7750000	11900000	10300000	6660000
pmf0282	341.1	113	0.73	342.12	[M-H]-	C05402	Melibiose	Carbohydrates	9450000	9100000	9740000	7210000	8210000	9500000	11000000	13000000	15600000
pmf0285	179.1	91	4.64	178.06	[M+H]+	C02666	4-Hydroxy-3-methoxycinnamaldehyde	Phenylpropanoids	819000	646000	776000	9	9	9	1120000	1650000	1000000
pmf0286	295.3	195.2	8.95	296.31	[M-H]-	C01389	Phytol	Terpene	3170000	3500000	3310000	3110000	2180000	3270000	4400000	3760000	4160000
pmf0291	96	68	0.85	95.09	[M+H]+	-	4-Hydroxypyridine	Alkaloids	2680000	2010000	2460000	2000000	1360000	1360000	1740000	2260000	1280000
pmf0292	302.3	109.2	7.49	301.3	[M+H]+	C00836	D-erythro-sphinganine	Amino acid and derivatives	349000	347000	347000	916000	1510000	992000	736000	789000	843000
pmf0294	271.3	105	12.24	270.29	[M+H]+	-	1-Octadecanol	Lipids	78000	65900	71600	69500	65300	73000	68600	67900	68500
pmf0295	325.1	163	2.83	324.08	[M+H]+	-	Skimmin	Phenylpropanoids	1590000	1300000	1560000	1750000	2180000	2590000	865000	694000	930000
pmf0298	109	81	3.23	110.04	[M-H]-	C00090	Pyrocatechol	Phenylpropanoids	67200	94100	106000	9	9	9	206000	276000	136000
pmf0302	435.1	289.1	4.3	434.12	[M+H]+	-	Engeletin	Flavonoid	687000	588000	605000	354000	413000	466000	153000	808000	704000
pmf0315	307.3	289.2	5.65	308.27	[M-H]-	C09183	Sclareol	Terpene	18600	37000	30300	42200	54900	59600	13400	39700	14100
pmf0320	197.1	155	4.27	196.07	[M+H]+	C10664	Acetosyringone	Phenylpropanoids	487000	452000	503000	400000	436000	401000	299000	387000	296000
pmf0326	167.1	125	4.24	166.06	[M+H]+	C11380	Apocynin	Phenylpropanoids	107000	106000	127000	99400	9	116000	110000	111000	114000
pmf0328	243.1	145	4.46	242.08	[M+H]+	C01727	lumichrome	Alkaloids	105000	103000	85400	68100	80900	81800	48800	71900	67100
pmf0332	457.4	439.3	11.07	456.36	[M+H]+	C17148	Oleanolic acid	Terpene	793000	814000	806000	1180000	599000	1020000	258000	228000	1260000
pmf0339	387.2	207	3.37	386.19	[M+H]+	-	Roseoside	Terpene	2170000	2320000	2400000	2480000	2450000	3040000	1600000	1480000	2410000
pmf0347	215.1	137	6.34	214.1	[M+H]+	C10254	Dihydropinosylvin	Others	49200	59700	46900	9	9	9	36200	116000	45900
pmf0348	187.1	97	4.43	188.14	[M-H]-	-	"2,6-Dimethyl-7-octene-2,3,6-triol"	Alcohols	64700	104000	79000	52400	57800	66800	111000	105000	88900
pmf0354	109	91	3.25	110.04	[M-H]-	C00090	Catechol	Phenylpropanoids	55900	78500	82300	9	9	9	209000	242000	118000
pmf0360	449.1	151	3.97	450.12	[M-H]-	C17449	Astilbin	Flavonoid	42500	66200	54000	24900	32300	18900	18400	43400	24200
pmf0370	479.2	317	4.55	478.15	[M+H]+	-	Persicoside	Flavonoid	17300000	19100000	20900000	11600000	27500000	19700000	20200000	19200000	14900000
pmf0371	315.1	300	4.72	316.06	[M-H]-	C10119	Pedalitin	Flavonoid	60700	88300	67800	9	9	9	142000	222000	99800
pmf0375	479.1	317	4.18	478.11	[M+H]+	-	Isorhamnetin 3-O-glucoside	Flavonoid	676000	994000	802000	610000	1310000	772000	980000	987000	713000
pmf0384	163.1	130	1.25	162.12	[M+H]+	C00745	Nicotine	Alkaloids	24900000	24100000	25300000	23800000	38500000	25800000	20200000	14700000	13300000
pmf0388	221.1	206	4.38	222.13	[M-H]-	-	Dehydrovomifoliol	Alcohols	22300	41000	33400	47100	9	96900	9	9	9
pmf0391	245.1	151	6.23	244.11	[M+H]+	-	Batatasin III	Others	2470000	2450000	2440000	1320000	537000	495000	2020000	6980000	1790000
pmf0397	311.3	183.1	11.1	312.3	[M-H]-	C06425	Arachidic acid	Lipids	34400000	34000000	34000000	29600000	26800000	31000000	9	26500000	29600000
pmf0399	309.3	227.3	10.72	310.29	[M-H]-	C16526	cis-Gondoic acid	Lipids	1620000	1800000	1630000	1160000	1180000	1400000	1380000	1310000	1710000
pmf0402	367.4	285.4	10.84	368.37	[M-H]-	C08320	Lignoceric acid	Lipids	27900	41300	33200	63300	50700	42800	86100	57000	57300
pmf0410	295.2	168	3.57	294.17	[M+H]+	C06528	Cinchonine	Alkaloids	142000	110000	85700	122000	70600	127000	88200	108000	92600
pmf0413	213.1	153	4.67	212.07	[M+H]+	C11155	Propyl gallate	Organic acids and derivatives	107000	132000	169000	183000	176000	273000	128000	87200	51800
pmf0415	195.1	137	4.84	194.09	[M+H]+	C17497	Zingerone	Phenylpropanoids	370000	413000	388000	487000	582000	555000	9	9	61400
pmf0416	193.2	175	9	192.15	[M+H]+	C12286	α-Ionone	Others	159000	192000	211000	231000	222000	197000	148000	200000	189000
pmf0417	595.2	287	3.7	596.17	[M-H]-	C09732	Eriocitrin	Flavonoid	87000	84100	67500	59300	70300	91200	68400	66900	89700
pmf0420	149	74.9	4.37	150.07	[M-H]-	C15513	Benzyl acetate	Organic acids and derivatives	209000	181000	301000	18000	25100	23400	38800	28000	36200
pmf0423	359.1	197	3.33	358.13	[M+H]+	C17071	Sweroside	Terpene	1390000	1240000	1620000	1160000	851000	1200000	1090000	1750000	1120000
pmf0425	149	87	0.84	150.02	[M-H]-	C02107	D-tartaric acid	Organic acids and derivatives	162000	147000	114000	94400	136000	105000	136000	172000	148000
pmf0433	375.1	195.1	3.08	374.12	[M+H]+	C09800	Swertiamarin	Terpene	451000	362000	440000	298000	373000	370000	326000	413000	372000
pmf0440	163.1	91.1	6.04	162.07	[M+H]+	C10475	4-Methoxycinna Maldehyde	Phenylpropanoids	190000	161000	216000	172000	218000	268000	211000	192000	261000
pmf0442	208.1	103	3.91	207.09	[M+H]+	C03519	N-Acetyl-L-phenylalanine	Amino acid and derivatives	67900	79700	94600	75900	75300	101000	9	75600	66200
pmf0443	249.1	185.1	7.06	248.14	[M+H]+	C07609	Parthenolide	Others	154000	157000	149000	177000	267000	277000	74500	9	66100
pmf0449	375.1	169.1	2.61	376.14	[M-H]-	C01512	Loganic acid	Terpene	127000	163000	151000	147000	151000	193000	110000	205000	9
pmf0455	432.3	415	3.4	431.34	[M+H]+	C10830	Peimine	Alkaloids	2770000	1580000	2330000	1310000	1530000	1470000	787000	615000	760000
pmf0465	387.1	122.9	3.26	388.14	[M-H]-	C09781	Geniposide	Terpene	33400	46500	41200	43400	25600	21400	53200	86300	48000
pmf0468	429.1	267.1	2.84	406.15	[M+Na]+	C17000	Morroniside	Terpene	1210000	984000	1180000	657000	597000	985000	1350000	1220000	1350000
pmf0470	132.1	73	0.79	131.06	[M+H]+	C03440	cis-4-Hydroxy-D-proline	Amino acid and derivatives	1220000	1530000	1080000	1980000	1280000	1520000	508000	1320000	818000
pmf0474	373.1	123	2.15	374.12	[M-H]-	C11673	Geniposidic acid	Terpene	1450000	1870000	1800000	1660000	1830000	2830000	1130000	2000000	1430000
pmf0477	529.4	403	10	528.38	[M+H]+	C17044	Pachymic acid	Terpene	286000	343000	328000	9	9	9	249000	996000	305000
pmf0484	132.1	86	1.35	131.09	[M+H]+	C01933	alpha-Aminocaproic acid	Amino acid and derivatives	2620000	2430000	2580000	2110000	1960000	2010000	3410000	2470000	2970000
pmf0489	353.2	336.9	4.64	352.15	[M+H]+	C05315	Palmatine	Alkaloids	54700	32400	57600	43200	46100	41100	35800	37700	31300
pmf0493	439	349.1	3.14	416.11	[M+Na]+	C10524	Puararin	Flavonoid	174000	183000	202000	9	9	186000	135000	218000	191000
pmf0499	765.2	603.2	3.39	742.27	[M+Na]+	C20786	Eleutheroside E	Phenylpropanoids	327000	246000	292000	189000	195000	205000	345000	338000	314000
pmf0504	275.2	109	6.52	274.19	[M+H]+	C07254	Nandrolone	Others	396000	402000	412000	285000	399000	292000	230000	710000	329000
pmf0509	153.2	71	12.43	152.12	[M+H]+	C00809	(-)-Camphor	Terpene	547000	706000	653000	735000	680000	649000	686000	675000	682000
pmf0511	585.4	371	11.29	584.42	[M+H]+	C08584	Capsanthin	Terpene	412000	412000	422000	440000	443000	431000	387000	403000	419000
pmf0519	327.1	207.2	2.78	328.08	[M-H]-	C09919	Bergenin	Others	311000	393000	383000	365000	480000	595000	253000	369000	248000
pmf0525	271	147	7.92	270.09	[M+H]+	C09269	Imperatorin	Phenylpropanoids	111000	107000	110000	104000	277000	142000	48400	115000	60700
pmf0527	245.1	159.2	8.3	244.11	[M+H]+	C09280	Osthole	Phenylpropanoids	345000	373000	383000	418000	687000	443000	276000	192000	287000
pmf0531	205.1	101	1.18	204.13	[M+H]+	C10760	N-Methylcytisine	Alkaloids	384000	210000	308000	223000	111000	138000	217000	177000	163000
pmf0533	557.2	395	4.75	534.21	[M+Na]+	C17048	Phillyroside	Phenylpropanoids	402000	386000	397000	411000	9	393000	432000	595000	580000
pmf0534	165.1	123	7.13	164.08	[M+H]+	C09904	Hinokitiol	Others	608000	718000	711000	416000	9	588000	9	9	9
pmf0541	287.1	155	4.87	288.1	[M-H]-	C17412	Shikonin	Quinones	85000	92600	97300	103000	103000	95500	128000	130000	127000
pmf0549	607.2	299	4.14	608.17	[M-H]-	C10039	Diosmin	Flavonoid	280000	277000	242000	238000	198000	250000	236000	264000	220000
pmf0551	269.1	226	8.57	268.07	[M+H]+	C11621	Tectochrysin	Flavonoid	603000	653000	648000	267000	600000	580000	481000	869000	655000
pmf0560	219.1	146	2.68	218.11	[M+H]+	C02983	Abrine	Alkaloids	1200000	1090000	1250000	1600000	806000	1360000	1060000	394000	1210000
pmf0562	265.1	245	8.46	266.13	[M-H]-	C10651	Magnolol	Phenylpropanoids	95300	109000	99600	49700	74900	78100	92500	232000	112000
pmf0565	175	112.9	0.79	176.04	[M-H]-	-	L-Dencichin	Alkaloids	558000	460000	372000	474000	467000	470000	422000	486000	523000
pmf0570	419.1	257	3.87	418.13	[M+H]+	C16978	Liquiritin	Flavonoid	236000	137000	233000	9	69500	148000	188000	140000	273000
pmf0578	191	111	1.18	192.03	[M-H]-	-	Citric acid monohydrate	Organic acids and derivatives	11900000	10100000	11600000	8840000	10200000	7590000	11500000	11800000	9910000
pmf0579	329.2	285	8.36	330.18	[M-H]-	C09069	Carnosol	Others	68500	76000	66100	52000	60400	55500	73500	66600	62300
pmf0583	435.1	167	4.36	436.14	[M-H]-	C01604	Phloridzin	Flavonoid	1030000	1330000	1260000	267000	174000	395000	397000	823000	375000
pmf0585	116.1	70	0.79	115.06	[M+H]+	C16435	Proline	Amino acid and derivatives	16100000	15600000	15000000	13300000	11800000	11500000	21500000	18400000	13600000
pmf0587	132	88	0.78	133.04	[M-H]-	C16433	Aspartic acid	Amino acid and derivatives	3010000	3270000	3010000	4600000	3100000	1500000	3540000	2300000	3050000
pmf0589	146	102	0.76	147.05	[M-H]-	-	Glutamic acid	Amino acid and derivatives	13700000	15200000	15300000	11700000	14200000	13600000	17900000	16700000	18000000
pmf0591	149.2	102.8	5.44	148.16	[M+H]+	C10438	Cinnamic acid	Phenylpropanoids	101000	101000	121000	109000	58900	84200	103000	103000	115000
pmf0592	283.3	247	7.96	282.33	[M+H]+	C09538	Artemisinin	Terpene	31200	63900	40500	9	9	9	27500	103000	34000
pmf0593	118.2	55.1	0.84	117.15	[M+H]+	C06417	D-(-)-Valine	Amino acid and derivatives	14200000	14000000	13100000	14000000	10100000	10100000	17500000	12800000	15200000
pmf0594	166.2	77	1.92	165.19	[M+H]+	C02265	D-(+)-Phenylalanine	Amino acid and derivatives	4080000	3930000	4030000	4220000	3100000	3690000	3890000	3220000	3950000
pmf0599	137.1	109	12.49	136.13	[M+H]+	C06306	(+)-alpha-Pinene	Terpene	109000	138000	111000	126000	101000	117000	127000	126000	113000
pmf0602	257	229.1	7.19	256.04	[M+H]+	C10395	Purpurin	Quinones	108000	121000	116000	9	9	9	107000	132000	191000
pmf0604	205.2	149	9.69	204.19	[M+H]+	C09629	β-Caryophyllene	Terpene	12700000	13800000	12200000	16400000	20100000	17300000	12700000	10600000	10700000
pmf0605	355.1	102.8	8.45	354.15	[M+H]+	C17499	Notopterol	Phenylpropanoids	40600	43400	43900	41300	45900	47400	34100	41100	31800
pmf0606	177	133.1	7.19	178.05	[M-H]-	-	Pectin (Technical Grade)	Others	212000	242000	212000	222000	171000	375000	287000	179000	414000
pmf0609	163	91	4.14	162.03	[M+H]+	C09315	Umbelliferone	Phenylpropanoids	141000	122000	124000	104000	81900	109000	58200	74100	128000
pmf0613	155.1	114	12.35	154.14	[M+H]+	C16772	α-Terpineol	Terpene	32900000	33400000	29200000	31200000	31300000	30400000	31500000	31700000	29400000
pmf0615	641.4	317	2.08	641.4	Protonated	-	"Petunidin 3, 5-diglucoside"	Anthocyanins	314000	275000	257000	250000	197000	206000	9	301000	272000
