# Supplementary material for: Combined Metabolome and Transcriptome Analyses Reveal the Effects of Mycorrhizal Fungus Ceratobasidium sp. AR2 on the Flavonoid Accumulation in Anoectochilus roxburghii during Different Growth Stages
Source: Int J Mol Sci. 2020 Jan 15;21(2):564. doi: 10.3390/ijms21020564 (PMC7013922; doi:10.3390/ijms21020564)
Supplement: Supplementary file 1 [file ijms-21-00564-s001.zip › Supplementary Table S2.xlsx]

## Sheet: Sheet1
Table S2. Recovery test for each analyte.
No.	Name	Sample weight (mg)	Sample content (ng)	Added amount (ng)	Detected amount (ng)	Recovery (%)	Average recovery (%)	RSD(%)
1	Nobiletin	20.09	54.24	27	79.46	93.41	93.24	1.6
		20.19	54.51	27	80.07	94.67
		20.12	54.32	27	78.96	91.26
		20.23	54.62	54	105.46	94.15
		20.11	54.33	54	104.78	93.43
		20.14	54.38	54	104.02	91.93
		20.12	54.32	82	132.78	95.68
		20.22	54.59	82	129.55	91.41
		20.08	54.22	82	130.67	93.23
2	Narcissin	20.13	1986.03	990	2995.11	101.93	99.54	1.37
		20.05	1978.13	990	2978.14	101.01
		20.11	1984.05	990	2954.22	98
		20.17	1989.97	1950	3920.16	98.98
		20.23	1995.89	1950	3941.23	99.76
		20.22	1994.91	1950	3930.32	99.25
		20.05	1978.13	2950	4855.45	97.54
		20.07	1980.11	2950	4912.76	99.41
		20.12	1985.04	2950	4933.55	99.95
3	Isorhamnetin-3-O-beta-D-glucoside	20.08	1048.18	525	1531.22	92.01	91.23	1.09
		20.03	1045.57	525	1522.34	90.81
		20.11	1049.74	525	1519.79	89.53
		20.23	1056.01	1050	2030.08	92.77
		20.14	1051.31	1050	2011.54	91.45
		20.21	1054.96	1050	2009.34	90.89
		20.09	1048.7	1550	2478.56	92.25
		20.02	1045.04	1550	2454.23	90.92
		20.22	1055.48	1550	2457.78	90.47
4	Tangeretin	20.1	115.58	55	162.45	85.22	86.03	3.44
		20.12	115.69	55	160.97	82.33
		20.12	115.69	55	163.23	86.44
		20.13	115.75	120	212.78	80.86
		20.09	115.52	120	217.67	85.13
		20.08	115.46	120	221.19	88.11
		20.14	115.81	175	273.14	89.9
		20.21	116.21	175	270.56	88.2
		20.13	115.75	175	269.88	88.07
5	Rutin	20.21	606.3	300	885.23	92.98	96.12	2.82
		20.08	602.4	300	880.08	92.56
		20.13	603.9	300	892.33	96.14
		20.15	604.5	600	1209.44	100.82
		20.08	602.4	600	1187.65	97.54
		20.1	603	600	1196.56	98.93
		20.16	604.8	900	1467.45	95.85
		20.13	603.9	900	1450.67	94.09
		20.12	603.6	900	1469.11	96.17
6	Quercetin	20.03	37.66	18.5	56.03	99.3	95.41	1.83
		20.12	37.83	18.5	55.64	96.27
		20.06	37.71	18.5	55.02	93.57
		20.15	37.88	38	73.98	95
		20.13	38.84	38	74.35	93.45
		20.09	37.77	38	74.28	96.08
		20.03	37.66	55	90.02	95.2
		20.1	37.79	55	90.12	95.15
		20.21	37.99	55	90.07	94.69
7	Isorhamnetin	20.01	77.04	38	109.12	84.42	89.28	4.55
		20	77	38	108.87	83.87
		20.05	77.19	38	109.34	84.61
		21.23	81.73	81	156.71	92.57
		21.12	81.31	81	155.23	91.26
		21.06	81.08	81	156.34	92.91
		22.23	85.58	128	205.67	93.82
		22.19	85.43	128	198.23	88.13
		22.06	84.93	128	202.67	91.98
8	Quercetin-7-O-glucoside	20	266	130	390	95.38	96.78	1.92
		20.05	266.67	130	387.67	93.08
		20.03	266.4	130	394.65	98.65
		21.12	280.9	280	552.67	97.06
		21.12	280.9	280	550.65	96.34
		21.17	281.56	280	555.22	97.74
		20.89	277.84	420	695.22	99.38
		21.12	280.9	420	689.12	97.2
		21.15	281.3	420	685.33	96.2
9	Kaempferol-3-O-glucoside	20.12	101.81	50	147.68	91.74	90.57	2.02
		20.17	102.06	50	147.87	91.62
		20.12	101.81	50	146.79	89.96
		20.14	101.91	100	189.65	87.74
		20.13	101.86	100	194.31	92.45
		20.16	102.01	100	190.87	88.86
		20.09	101.66	150	234.67	88.67
		20.05	101.45	150	240.82	92.91
		20.1	101.71	150	238.48	91.18
