# Supplementary material for: Combined Metabolome and Transcriptome Analyses Reveal the Effects of Mycorrhizal Fungus Ceratobasidium sp. AR2 on the Flavonoid Accumulation in Anoectochilus roxburghii during Different Growth Stages
Source: Int J Mol Sci. 2020 Jan 15;21(2):564. doi: 10.3390/ijms21020564 (PMC7013922; doi:10.3390/ijms21020564)
Supplement: Supplementary file 1 [file ijms-21-00564-s001.zip › Supplementary Table S3.xlsx]

## Sheet: Sheet1
Table S3. Primer designed for qRT-PCR.
Genes	Unigene ID	Forward primer sequence (5'-3')	Reverse primer sequence (5'-3')
EF-1-α	DN98549_C1_g5	GATGACCGGGAGCATCAATGAC	CTGAGCGTGAACGTGGTATCAC
PAL	DN105791_C1_g1	CGAGGAACAAGGCCATCCAT	GCGAACATGAGCTTCCCGAT
C4H	DN111539_C0_g1	CTCCCCATCCTCGGAATCAC	GACTGAACTGCCCTCCCTTC
4CL	DN100931_C1_g2	TCGTACACGTTCCTCTGCAC	CACGGAAAGATGCGTCACAC
CHS	DN117328_C0_g2	TTCCAACTCGTCTCAGCGTC	TTGGAGATGATGGCCGGAAC
CHI	DN113216_C3_g2	AAGGTGACGTTCCTCGTTCC	CTGCGGTGAATGGGTGTAGA
F3H/FLS	DN109287_C4_g2	GAACACCGGTCAAAGCCAGA	GTCTTCGTCGTCAGGGATCG
F3'H	DN108173_C2_g1	GCCGTTCCTGTCATAGTCGT	AGTTAGCATCGTGGGTTCGG
GT	DN99089_C5_g1	CCAGCTTACGCCGATCACTT	CGCCAGTTCTTTGGCTTCAC
RT	DN113485_C1_g1	TTCCGGTAGGGTTTCTCCCA	AAGGGCAGATCGCTCAGTTC
